# 1 A local insulin reservoir ensures developmental progression in condition of nutrient 2 shortage in *Drosophila*

3 Suhrid Ghosh<sup>1,2\*</sup>, Weihua Leng<sup>1</sup>, Michaela Wilsch-Bräuninger<sup>1</sup>, Pierre Léopold<sup>3\*</sup> and Suzanne Eaton<sup>1,2</sup>

4 <sup>1</sup>Max Planck Institute of Molecular Cell Biology and Genetics, Pfotenhauerstraße 108

5 01307 Dresden, Germany

6 <sup>2</sup>Biotechnologisches Zentrum, Technische Universität Dresden, Tatzberg 47/49, 01307 Dresden, Germany.

7 <sup>3</sup>Institut Curie, PSL Research University, CNRS UMR3215, INSERM U934, 26 Rue d'Ulm, 75005 Paris, France.

8 \*Authors for correspondence: [ghosh@mpi-cbg.de](mailto:ghosh@mpi-cbg.de), [pierre.leopold@curie.fr](mailto:pierre.leopold@curie.fr)

9

10

## 11 **Summary** (129 words, max 150)

12 Insulin/IGF signalling (IIS) controls many aspects of development and physiology. In *Drosophila*, a conserved  
13 family of insulin-like peptides (Ilp) is produced by brain neurosecretory cells and exerts systemic functions.  
14 Here, we describe the local uptake and storage of Ilps in the Corpora Cardiacia (CC), a group of alpha cell  
15 homolog that produces the glucagon-like hormone AKH. Dilp uptake relies on the expression of ImpL2, an  
16 IGF-BP that accumulates in the CCs. During nutrient shortage, this specific reserve of Ilps is released and  
17 activates IIS in a paracrine manner in the prothoracic gland, securing accelerated entry into pupal  
18 development through the production of the steroid hormone ecdysone. We therefore uncover a sparing  
19 mechanism whereby local Ilp storage and release activates the production of steroids and ensures early  
20 developmental progression in adverse food conditions.

21

## 22 **Highlights**

- 23 - Dilps are uptaken by CC cells through the IGF-BP Imp-L2
- 24 - the CC-Dilp store is released upon nutrient shortage and activates IIS through CC projections on the PG
- 25 - upon nutrient shortage, IIS activation in the PG ensures an accelerated transition from larval feeding stage  
26 to metamorphosis.

27

## 28 **Keywords**

29 insulin, ecdysone, nutrition, hormone secretion, *Drosophila*

30

## 31 Introduction

32 Insulin and insulin-like growth factors (IGFs) are conserved modulators of growth and metabolic  
33 homeostasis. They are produced by specific endocrine organs in response to nutrient availability and  
34 stimulate peripheral tissues through two main routes. Circulating insulins and IGFs act in an endocrine  
35 manner on distant organs through mechanisms of secretion and action that have been extensively studied  
36 (Campbell & Newgard, 2021; Petersen & Shulman, 2018; Tokarz, MacDonald, & Klip, 2018). In several  
37 instances, insulin/IGFs are also produced and act locally. This is the case for IGF-I produced in peripheral  
38 organs like bone chondrocytes, which acts in an autocrine manner (Wang, Bikle, & Chang, 2013). Local  
39 insulin/IGF signalling is also key for the development and homeostasis of the central nervous system, which  
40 is separated from the systemic circulation by the blood-brain barrier (Fernandez & Torres-Alemán, 2012).  
41 In mammalian brains, IGF-I expression is spatially and temporally controlled, participating in the rapid  
42 proliferation of neural stem cells (NSCs) (Popken et al., 2004). IGF-I is expressed in neurons, astrocytes and  
43 NSCs, contributing to both paracrine and autocrine signaling (D’Ercole & Ye, 2008).  
44 In the *Drosophila* model, a subset of insulin/IGFs called *Drosophila* insulin-like peptides (Dilps) is expressed  
45 in neurosecretory cells and contributes to systemic activation of insulin/IGF signaling (IIS). Similar to  
46 mammals, local brain expression of Dilps in glial cells also contributes to coupling NSC proliferation with  
47 systemic metabolic status (Yuan, Sipe, Suzawa, Bland, Siegrist & Id, 2020; Spéder & Brand, 2018).  
48 In parallel, local activation of IIS can be triggered by alternative routes, providing the possibility to uncouple  
49 insulin/IGF signaling from nutrient availability. The role of this uncoupling is exemplified in the case of “brain  
50 sparing” a phenomenon observed in many species, including human, whereby moderate nutrient  
51 deprivation affects primarily body growth, while brain growth is preserved (Cox & Marton, 2009). The  
52 molecular mechanism of brain sparing has been addressed in *Drosophila*. It is associated with the specific  
53 activation of neuroblast growth through local production of the ligand Jelly belly (Jeb) and activation of the  
54 Anaplastic lymphoma kinase (Alk) receptor upstream of PI-3-kinase, even in the absence of nutrients (Cheng  
55 et al., 2011).  
56 Here, we unravel a distinct mechanism locally uncoupling insulin release from the presence of nutrients and  
57 leading to the maintenance of IIS activation in a key endocrine organ during development. The initial  
58 observation of a pool of Dilps accumulating in an endocrine gland called the corpora cardiaca (CC) (S. K. Kim  
59 & Rulifson, 2004), suggested the possibility that these insulins could activate IIS under specific conditions,  
60 in a way distinct from their systemic function. Indeed, the CC cells do not produce insulins, but rather a  
61 glucagon-like hormone called AKH, whose release is stimulated by nutrient shortage. Our present work  
62 unravels some features of the mechanism of uptake of insulins by the CCs. We show that, conversely to  
63 systemic insulins, CC insulins are released in response to nutrient deprivation. We further demonstrate that

64 the local release of CC insulins upon starvation maintains high IIS levels in the prothoracic gland (PG), which  
65 produces the steroid ecdysone. Finally, we establish that the local activation of IIS in the PG secures a fast  
66 transition to pupal development in absence of nutrients.

67 Therefore, our work uncovers a distinct mechanism of organ-sparing, whereby a pre-accumulated store of  
68 Dilps is released in adverse food conditions and ensures fast developmental progression through steroid  
69 production.

70

## 71 Results

### 72 Corpora cardiaca cells take up Dilp2 and 5

73 The Corpora Cardiaca (CC) is part of the ring gland (RG), a composite endocrine organ located in  
74 the vicinity of the larval central nervous system (CNS) (Figure 1a). Apart from the CC, two other endocrine  
75 tissues - the prothoracic gland (PG), which synthesizes ecdysone, and the corpora allata (CA), which  
76 synthesizes the juvenile hormone – together form the PG (Figure 1b). CC cells are neurosecretory in nature  
77 and extend processes that terminate in the larval aorta and the PG (Figure 1b). The IPCs, located in the pars  
78 intercerebralis of the larval brain, also project to the aorta (Figure 1b). Previous work describes a strong  
79 accumulation of anti-Dilp2 immunoreactivity in the corpora cardiaca (CC) (S. K. Kim & Rulifson, 2004), in  
80 addition to the one observed in the cell bodies of IPCs (Rulifson, 2002). However, whether CC cells express  
81 the Dilp2 gene has not been investigated.

82 In order to clarify the presence and production of Dilp2 in CC cells, we co-labelled the IPC  
83 projections by over-expressing a GFP-tagged Synaptotagmin-1 (*SYT1-GFP*) using a *dilp2-gal4* driver  
84 (*IPC>SYT1-GFP*, Figure 1c) and anti-Dilp2 immunostaining. We confirmed the presence of IPC processes  
85 containing DILP2 and innervating the aorta (Figure 1c). Additionally, Dilp2 could also be detected without  
86 GFP colocalization in the CC soma (Figure 1c). Expressing *SYT1-GFP* using a CC-specific GAL4 driver (*akh-*  
87 *gal4*), we confirmed that Dilp2 indeed co-localizes with GFP in CC cells and their processes projecting on  
88 the PG and the aorta (Figure 1d). CC soma also stain for anti- Dilp5, and both Dilp2 and Dilp5 show high  
89 degree of subcellular colocalization (Figure 1e), suggesting that these two Dilps may serve a common  
90 function in the CCs. Their presence in the soma of the CC cells could either be due to a transient expression  
91 in the CCs or their uptake by the CCs from a pool initially produced by the IPCs. To address this point, we  
92 specifically knock-down *DILP2* or *DILP5* expression in the IPCs. This led to their loss in CC cells (Figures 1f-i),  
93 indicating that the IPCs are the only source of Dilp production, followed by their specific uptake in the CCs.  
94 Of note, the knock-down of Dilp5 expression in the IPCs do not affect the uptake of Dilp2 by the CCs (Figure  
95 S1).

96

## 97 **IMPL2 mediates the uptake of Dilp2 and Dilp5 in the Corpora cardiaca**

98 In addition to the canonical insulin receptor (*dInR*), *Drosophila* larvae express another insulin-binding  
99 protein called IMPL2. IMPL2 binds circulating Dilp2 and 5, resulting in the downregulation of insulin/IGF-  
100 signalling (IIS) in target tissues (Figueroa-Clarevega & Bilder, 2015). Beside tumorous imaginal discs and fat  
101 body (Figueroa-Clarevega & Bilder, 2015; Lee et al., 2018), which produce a circulating form of Impl2, a  
102 subset of neurons in the larval brain express the IMPL2 gene (Honegger et al., 2008). Using specific anti-  
103 Impl2 antibodies, we also detected IMPL2 in the CCs (Figure 2a). Similar staining patterns between IMPL2  
104 and Dilp2 suggests that they may be partially bound inside the CC. Staining for IMPL2 in Dilp2/Dilp5 double  
105 knock-out larvae ruled out a possible staining artefact due to cross-reactivity of the respective antibodies  
106 (Figure S2). Additionally, our results show that the presence of IMPL2 in the CC is independent of Dilp2 and  
107 5 production (Figure S2).

108 IMPL2 binds to Dilps but, unlike *dInR*, does not have a trans-membrane domain (Roed et al., 2018). A  
109 previous study (Bader et al., 2013) showed that a membrane-associated form of IMPL2 produced in a few  
110 brain neurons binds Dilp2 and facilitates its contact with *dInR*, resulting in activation of intracellular IIS  
111 signalling. While *dInR* is recycled to the membrane after endocytosis, the IMPL2-Dilp2 complex is then  
112 degraded (Bader et al., 2013). In order to clarify the mechanism of Dilp uptake by the CCs, we knocked-  
113 down *dInR* and IMPL2 and compared the amount of Dilps present in CC cells. *dInR* and IMPL2 knock-down  
114 were first controlled for their efficacies in the wing disc and CC respectively (Figure S4 and S5a). While  
115 silencing *dInR* in CCs had no effect on Dilp2 localization, *Impl2* knock-down significantly reduced Dilp2  
116 staining in the CC soma (Figures 2b and 2c). Similar results were obtained for Dilp5 localisation (Figure S3).  
117 The knock-down of *dInR* reduces CC cell area and shows a slight increase in mean intensities of Dilp2 (Figures  
118 2c) and 5 (Figures S3). Silencing *Impl2* in CCs did not affect expression of *Impl2* in brain neurons (Figures  
119 S5b). We conclude from these experiments that CC cells require IMPL2, but not *dInR*, to take up Dilps. We  
120 next ensured that preventing Dilp uptake in the CC does not affect endogenous glucagon-like AKH  
121 production by staining CCs with anti-AKH antibodies (Figures 2d and 2e). Therefore, *Impl2* silencing in CC  
122 cells is an efficient tool to study the physiological function of the pool of Dilps present in the CCs.

123

## 124 **Corpora cardiaca act as a functional Dilp store**

125 Larvae lacking Dilp2 and Dilp5 show reduced growth during larval stages, require extended time to develop  
126 and produce smaller adults (Grönke, Clarke, Broughton, Andrews, & Partridge, 2010). To evaluate the  
127 contribution of the CC store of Dilp2 and Dilp5 to general IIS, we measured the developmental time, larval  
128 growth and adult size of animals devoid of *Impl2* in CC cells, therefore lacking Dilp accumulation in CCs. We  
129 observed that larvae of the *CC>Impl2-RNAi* genotype show approx. 10 hr advanced pupariation compared

130 to controls (Figure 3a). However, pupal volume, as a measure of total larval growth, adult mass and wing  
131 area are not modified (Figure 3b-d). This indicates that animals devoid of a CC-Dilp store experience  
132 accelerated growth without changing final size. Measuring larval mass across the L3 stage, we indeed found  
133 that removal of CC-Dilps leads to an increase in larval growth rate (Figure 3e). Accelerated growth was  
134 previously observed upon general increase in intracellular IIS (Brogiolo et al., 2001) or over-expression of  
135 *DILP2* (Géminard, Rulifson, & Léopold, 2009; Ikeya et al., 2002) during larval development. When measuring  
136 circulating Dilp2 from *CC>ImpL2-RNAi* larvae, we found it doubling compared to controls (Figure 3f). To  
137 support this finding, we also found elevated levels of fat body IIS at 104hr AEL compared to control  
138 genotypes, measured as the relative distribution of the transcription factor dFOXO between nucleus and  
139 cytoplasm (Figure 3g and 3h). Therefore, preventing DILP uptake in the CC increases circulating Dilp2 levels,  
140 resulting in accelerated growth.

141  
142 **CC-Dilps are packaged for co-secretion with AKH**  
143 Our previous results indicate that approximately equal amounts of Dilp circulate in the hemolymph and are  
144 sequestered in the CC cells (Figure 3f). We therefore studied the control of secretion of this major pool of  
145 CC-Dilp. Based on colocalization using light microscopy, it was previously proposed that in *ImpL2*-expressing  
146 neurons, *ImpL2*/Dilp2 complexes are degraded through the late endosomal route (Bader et al., 2013). Given  
147 the small size of the CC soma, we used electron microscopy to identify DILP-containing structures inside the  
148 CC cells (Figure 4a). Stitching several high-resolution images from a single tissue section shows the overall  
149 organization of the CC cytoplasm (Figure 4b). The cytoplasm contains large networks of ER, occasionally  
150 interspersed with Golgi complexes, and clusters of dense-core secretory vesicles (DCVs) occupying the  
151 perinuclear space (Figure 4b). This architecture is in line with the capacity of CC cells to secrete the  
152 glucagon-like hormone AKH, and similar observations have been made in other insects (Willey & Chapman,  
153 1960). When probed for Dilp5 using immuno-gold staining, CC cells showed high reactivity in clusters of  
154 DCVs compared to rest of the cytoplasm (Figures 4c and 4d). Probing simultaneously for Dilp2 and 5 using  
155 gold particles of two different sizes, we observed a co-localization of both Dilps in DCVs, but also in multi-  
156 vesicular bodies (MVBs) (Figure 4e). MVBs form in the late endocytic pathway and are responsible for  
157 recycling and degradation of endocytic compartments (Cosker & Segal, 2014; Sorkin & Von Zastrow, 2009).  
158 Alternatively, they also give rise to secretory granules (Gondré-Lewis, Park, & Loh, 2012). Our results  
159 therefore suggest that Dilp2 and 5 are taken up and packaged into secretory DCVs, making the CC cells a  
160 potential alternative source of insulin in the *Drosophila* larva.

161 CC cells endogenously produce the glucagon-like peptide hormone AKH and release it under nutrient-  
162 limiting conditions (S. K. Kim & Rulifson, 2004). When probing CC cells for AKH and Dilp2 using two

163 differently-sized gold particles, we found that AKH and Dilp2 co-localize in the same DCVs (Figure 4f). We  
164 also noted that AKH seems more abundant than Dilp2 in these DCVs (Figure 4g). Therefore, two functionally  
165 antagonistic hormones, AKH and Insulins, are co-packaged in the same secretory structures, raising the  
166 intriguing possibility that they are released by CC cells in the same physiological context (i.e. limiting  
167 nutrients).

168

### 169 **CC-Dilps control the time to pupariation under nutrient limitation.**

170 What could be the physiological role of the pool of CC-insulin? During the late larval period, animals pass  
171 through a nutrient restriction checkpoint (NRC), beyond which larvae are committed to pupal development  
172 even when fully starved (Pan, Neufeld, Connor, et al., 2019). Early observations (Beadle et. al., 1938)  
173 indicate that when starved after the NRC, *Drosophila* larvae pupariate earlier than fed controls, as we  
174 observed for *CC>w1118* (Figure 5a,b).

175 Several lines of evidence suggest that the pool of CC-Dilps induces early pupariation upon starvation post-  
176 NRC. First, we noticed that, when comparing fed and starved conditions, the acceleration observed for  
177 *CC>w1118* controls is absent in the *CC>ImpL2-RNAi* background (Figure 5c). As described before (see Figure  
178 3a,e), fed *CC>ImpL2-RNAi* larvae pupariate earlier than fed *CC>* controls due to accelerated growth, but in  
179 *CC>ImpL2-RNAi* larvae, the difference between fed and starved conditions is abrogated (marked as a grey  
180 area in Figures 5b,c). We then confirmed that CC-Dilps are released upon low/no nutrient conditions (Figure  
181 5d-g), reminiscent of what is observed for the control of AKH secretion (J. Kim & Neufeld, 2015). The  
182 transition into pupal development requires a surge of ecdysone production and previous work indicate that  
183 activation of IIS is required for ecdysone biosynthesis by the PG (Boulan, Martín, & Milán, 2013; Colombani,  
184 2005). Therefore, our observation that CC cells send projections to the PG raises the possibility of a local  
185 delivery of Dilps to the PG in response to starvation. To test this idea, we compared the levels of circulating  
186 Dilp2 in *CC>* and *CC>ImpL2-RNAi* larvae under different nutritional conditions. In fed conditions, suppressing  
187 the CC-Dilp pool leads to an increase in circulating Dilp2 (Figure 5h). However, during starvation post-NRC,  
188 no circulating Dilp2 is detected either in *CC>* or *CC>ImpL2* conditions (Figure 5i), indicating that the release  
189 of the CC pool of Dilp2 does not contribute to increasing systemic Dilp2. In parallel, we measured the  
190 nucleus/cytoplasm ratio of dFOXO in fat cells as a marker of peripheral IIS (Figure 5j,k). Again, no difference  
191 in adipose IIS was observed between *CC>* and *CC>ImpL2-RNAi* larvae starved after the NRC, indicating that  
192 under these conditions, CC-Dilp2 does not contribute to general IIS. In contrast, when conducting a similar  
193 analysis of the cells of the prothoracic gland, which synthesizes ecdysone, we observe that starvation after  
194 the NRC induces an increase in nuclear localization of dFOXO in the PG of *CC>ImpL2-RNAi* but not of *CC>*  
195 control animals (Figure 5l,m). This result indicates that CC-Dilps contribute to maintaining a high level of IIS

196 activation in PG cells in response to post-CW starvation. In line with our finding that *CC>ImpL2-RNAi* larvae  
197 pupariate earlier under these conditions, we conclude that the pool of CC-Dilps contributes to a local  
198 activation of IIS in PG cells, maintaining their capacity to synthesize ecdysone and allowing a premature  
199 transition into pupal development in response to late starvation.

200

201

## 202 Discussion

203 In this study, we re-evaluate a previous observation whereby glucagon-producing cells take up insulin  
204 peptides, and demonstrate the relevance of this phenomenon during *Drosophila* larval development. In the  
205 course of early studies on *Drosophila* insulin-producing cells (S. K. Kim & Rulifson, 2004), it was indeed noted  
206 that larval CC cells strongly label for Dilp2 peptides. This puzzling observation suggested that the larval CC  
207 could serve the role of a so-called “neurohemal” organ, storing Dilps for delivery in the general circulation  
208 under specific conditions. However, the mechanistic and functional aspects of this Dilp store were unknown.  
209 Our study now sheds new light on the role of CC-Dilps, linking them to another unexplained observation,  
210 the starvation-induced, premature transition of *Drosophila* larvae into pupal development (Beadle et. al.,  
211 1938).

### 212 Accelerating development upon post-critical weight starvation

213 *Drosophila* populations can suffer episodes of nutrient limitation, particularly during the larval period when  
214 mobility of individuals is limited, preventing them from exploring alternative food sources. When larvae  
215 endure full starvation passed the so-called nutrient restriction checkpoint (NRC), an acceleration of  
216 pupariation is observed and animals transit faster to an adult reproductive state, with a trade-off on  
217 individual size. This contrasts with the observation that Dilp secretion is inhibited by starvation (Géminard  
218 et al., 2009), leading to a reduction of circulating hormone levels. Such reduction should indeed affect the  
219 production of ecdysone, which relies on IIS in PG cells (Colombani, 2005). Our present work indicates that  
220 upon limiting nutrients, CC cells secrete stored Dilps to the PG in a paracrine fashion (through PG-specific  
221 projections) without affecting systemic IIS. The CC-derived Dilps sustain IIS in PG cells, providing the  
222 necessary signalling input for ecdysone production and accelerated pupariation. Indeed, IIS activation could  
223 prevent starvation-induced autophagy in PG cells, which has been shown to block ecdysone production in  
224 condition of a pre-NRC starvation, by shunting cholesterol away from the biosynthetic pathway (Pan,  
225 Neufeld, & O’Connor, 2019). Recent evidence suggests that alternative nutrient-independent growth  
226 factors such as Jelly-belly (Jeb) can also act on PG cells to stimulate IIS and ecdysone production (Pan &  
227 O’Connor, 2020). Jeb and Dilps could constitute separate inputs on ecdysone production, explaining why

228 removal of CC Dilps only affects acceleration upon nutrient restriction but does not delay pupariation.  
229 Whether CC-Dilps are uniquely targeted to the PG, and through which mechanism, are still open questions.

230

### 231 **Storing Dilps away from general circulation**

232 We find that preventing CC-Dilp storage increases circulating levels by 2-fold. This accelerates animal's  
233 growth rate during the late larval stages, when circulating Dilp levels wane (compare [Figures 3f and 5h](#) ; also  
234 see Okamoto & Nishimura, 2015). We also noted that such accelerated larval growth does not affect adult  
235 size due a compensatory advance in pupariation. This result suggests an interdependency relationship  
236 between the two Dilp reservoirs, whereby the CC-Dilp store forms from ILP-produced insulins that are  
237 derouted from the general circulation in conditions of optimal nutrition. It has been described previously  
238 that the IPC project their termini in proximity of the CCs onto the aorta. Whether CC-Dilp accumulates  
239 through local delivery of IPC-produced Dilps or by uptake from the general circulation is still unknown.

240 Insulins bind to their cognate receptor InR in target tissues and are then co-endocytosed and later degraded  
241 (Sopko & Perrimon, 2013; Sorkin & Von Zastrow, 2009). Our study demonstrates that the uptake of Dilps by  
242 CC cells does not rely on InR but rather Imp-L2, an alternative insulin-binding protein previously shown to  
243 bind circulating Dilps.-This result contrasts with the previously described case of Imp-L2-producing *Hugin*  
244 neurons in the larval CNS, where both InR and Imp-L2 are required for Dilp uptake (Bader et al., 2013). This  
245 difference might have important functional consequences. In contrast to endocytosed Dilps/Inr complexes,  
246 which are prone to degradation, endocytosed ImpL2/Dilp complexes are routed towards storage in DCV, in  
247 the absence of local activation of IIS. Dilps are co-packaged with AKH in DCVs, possibly during the DCV  
248 maturation phase. This phase is characterized by cargo exchange between endo-lysosomal compartments  
249 and immature vesicles budding off from the trans-Golgi network (Topalidou et al., 2016). Recent studies  
250 (Gondré-Lewis et al., 2012; Lund, Lycas, Schack, Andersen, & Gether, 2020) suggest that RAB2 and  
251 associated proteins are involved in this exchange. However, we do not know if these components  
252 participate in routing DILPs and AKH to DCVs in the CC. Further, Dilps are anterogradely transported along  
253 the axonal projections in the PG. This process is similar to the transcytosis of various trophic factors and  
254 pathogens observed in mammalian nervous systems (Von Bartheld, 2004). Unlike simultaneous uptake and  
255 release previously demonstrated in other neuron types (Hémar, Olivo, Williamson, Saffrich, & Dotti, 1997;  
256 Von Bartheld, Wang, & Butowt, 2001; Yamashita, Joshi, Zhang, Zhang, & Kuruvilla, 2017), we show here that  
257 Dilp uptake and release are temporally separated during larval development. In all, this sheds light on the  
258 unique ability of CC neurosecretory cells to convert an endocrine signal like insulin into a paracrine one.

259



260 In conclusion, we reveal here a mechanism of organ sparing relying on the storage and release of insulins,  
261 allowing the maintenance of IIS activation and ecdysone production in a paracrine organ. The existence of  
262 such mechanism opens the intriguing possibility that local pools of insulin/IGF could be used in response to  
263 environmental signals to maintain IIS signalling in spared organs in other models.

264

265

## 266 Acknowledgements

267 This article is dedicated to the memory of our great colleague and mentor Prof./Dr. Suzanne Eaton. We are  
268 grateful to Dr. Natalie Dye for her supervision and leadership. We thank Dr. Jonathan Rodenfels, the Eaton  
269 and Leopold lab members for insightful discussions and comments on the manuscript. We would also like  
270 to thank the BDSC, Prof. Linda Partridge and Dr. Jason Tennessen for providing us with fly lines, Prof. Marc  
271 Tatar and Dr. Stephanie Post for sharing reagents, and Dr. Hugo Stocker for gifting us the Imp-L2 antibody.  
272 The scientific illustrations were done by Dr. Bertsy Goic. This work was supported by Deutsche  
273 Forschungsgemeinschaft (DFG/FOR2682), Max-Planck-Gesellschaft and Institut Curie, INSERM.

274

## 275 Author contributions

276 Conceptualization, S.G., S.E., P.L., Methodology, S.G., S.E., P.L., Investigation, S.G., W.L., M.W.-B., Writing  
277 and editing, S.G., P.L., Funding Acquisition, S.E.; Supervision, S.E., P.L.

278

## 279 Declaration of interests

280 The authors declare no competing interests.

281

282

## 283 References

- 284 Bader, R., Sarraf-Zadeh, L., Peters, M., Moderau, N., Stocker, H., Köhler, K., ... Hafen, E. (2013). The IGFBP7  
285 homolog Imp-L2 promotes insulin signaling in distinct neurons of the *Drosophila* brain. *Journal of Cell*  
286 *Science*, 126(12), 2571–2576. <https://doi.org/10.1242/jcs.120261>
- 287 Boulan, L., Martín, D., & Milán, M. (2013). Bantam miRNA promotes systemic growth by connecting insulin  
288 signaling and ecdysone production. *Current Biology*, 23(6), 473–478.  
289 <https://doi.org/10.1016/j.cub.2013.01.072>
- 290 Brogiolo, W., Stocker, H., Ikeya, T., Rintelen, F., Fernandez, R., & Hafen, E. (2001). An evolutionarily  
291 conserved function of the *drosophila* insulin receptor and insulin-like peptides in growth control.

- 292 *Current Biology*, 11(4), 213–221. [https://doi.org/10.1016/S0960-9822\(01\)00068-9](https://doi.org/10.1016/S0960-9822(01)00068-9)
- 293 Campbell, J. E., & Newgard, C. B. (2021). Mechanisms controlling pancreatic islet cell function in insulin  
294 secretion. *Nature Reviews Molecular Cell Biology*, 22(2), 142–158. [https://doi.org/10.1038/s41580-](https://doi.org/10.1038/s41580-020-00317-7)  
295 020-00317-7
- 296 Cardona, A., Saalfeld, S., Schindelin, J., Arganda-Carreras, I., Preibisch, S., Longair, M., ... Douglas, R. J. (2012).  
297 TrakEM2 software for neural circuit reconstruction. *PLoS ONE*, 7(6).  
298 <https://doi.org/10.1371/journal.pone.0038011>
- 299 Cheng, L. Y., Bailey, A. P., Leever, S. J., Ragan, T. J., Driscoll, P. C., & Gould, A. P. (2011). Anaplastic  
300 Lymphoma Kinase Spares Organ Growth during Nutrient Restriction in *Drosophila*. *CELL*, 146(3), 435–  
301 447. <https://doi.org/10.1016/j.cell.2011.06.040>
- 302 Colombani, J. (2005). Antagonistic Actions of Ecdysone and Insulins Determine Final Size in *Drosophila*.  
303 *Science*, 310(5748), 667–670. <https://doi.org/10.1126/science.1119432>
- 304 Cosker, K. E., & Segal, R. A. (2014). Neuronal signaling through endocytosis. *Cold Spring Harbor Perspectives*  
305 *in Biology*, 6(2). <https://doi.org/10.1101/cshperspect.a020669>
- 306 Cox, P., & Marton, T. (2009). Pathological assessment of intrauterine growth restriction. *Best Practice and*  
307 *Research: Clinical Obstetrics and Gynaecology*, 23(6), 751–764.  
308 <https://doi.org/10.1016/j.bpobgyn.2009.06.006>
- 309 D’Ercole, A. J., & Ye, P. (2008). Minireview: Expanding the mind: Insulin-like growth factor I and brain  
310 development. *Endocrinology*, 149(12), 5958–5962. <https://doi.org/10.1210/en.2008-0920>
- 311 Fernandez, A. M., & Torres-Alemán, I. (2012). The many faces of insulin-like peptide signalling in the brain.  
312 *Nature Reviews Neuroscience*, 13(4), 225–239. <https://doi.org/10.1038/nrn3209>
- 313 Figueroa-Clarevega, A., & Bilder, D. (2015). Malignant *Drosophila* tumors interrupt insulin signaling to induce  
314 cachexia-like wasting. *Developmental Cell*, 33(1), 47–56.  
315 <https://doi.org/10.1016/j.devcel.2015.03.001>
- 316 Géminard, C., Rulifson, E. J., & Léopold, P. (2009). Remote Control of Insulin Secretion by Fat Cells in  
317 *Drosophila*. *Cell Metabolism*, 10(3), 199–207. <https://doi.org/10.1016/j.cmet.2009.08.002>
- 318 Gondré-Lewis, M. C., Park, J. J., & Loh, Y. P. (2012). *Cellular Mechanisms for the Biogenesis and Transport of*  
319 *Synaptic and Dense-Core Vesicles*. *International Review of Cell and Molecular Biology* (Vol. 299).  
320 Elsevier. <https://doi.org/10.1016/B978-0-12-394310-1.00002-3>
- 321 Grönke, S., Clarke, D.-F., Broughton, S. J., Andrews, T. D., & Partridge, L. (2010). Molecular Evolution and  
322 Functional Characterization of *Drosophila* Insulin-Like Peptides. *PLoS Genetics*, 6(2), 18.  
323 <https://doi.org/10.1371/journal.pgen.1000857>
- 324 Hémar, A., Olivo, J. C., Williamson, E., Saffrich, R., & Dotti, C. G. (1997). Dendroaxonal transcytosis of

- 325 transferrin in cultured hippocampal and sympathetic neurons. *Journal of Neuroscience*, 17(23), 9026–  
326 9034. <https://doi.org/10.1523/jneurosci.17-23-09026.1997>
- 327 Honegger, B., Galic, M., Köhler, K., Wittwer, F., Brogiolo, W., Hafen, E., & Stocker, H. (2008). Imp-L2, a  
328 putative homolog of vertebrate IGF-binding protein 7, counteracts insulin signaling in *Drosophila* and  
329 is essential for starvation resistance. *Journal of Biology*, 7(3). <https://doi.org/10.1186/jbiol72>
- 330 Id, X. Y., Id, C. W. S., Suzawa, M., Id, M. L. B., & Id, E. S. (2020). Dilp-2 – mediated PI3-kinase activation  
331 coordinates reactivation of quiescent neuroblasts with growth of their glial stem cell niche, 1–23.  
332 <https://doi.org/10.1371/journal.pbio.3000721>
- 333 Ikeya, T., Galic, M., Belawat, P., Nairz, K., Hafen, E., & Zu, C.-. (2002). Nutrient-Dependent Expression of  
334 Insulin-like Peptides from Neuroendocrine Cells in the CNS Contributes to Growth Regulation in  
335 *Drosophila*, 12(02), 1293–1300.
- 336 Isabel, G., Martin, J. R., Chidami, S., Veenstra, J. A., & Rosay, P. (2005). AKH-producing neuroendocrine cell  
337 ablation decreases trehalose and induces behavioral changes in *Drosophila*. *American Journal of*  
338 *Physiology - Regulatory Integrative and Comparative Physiology*, 288(2 57-2), 531–538.  
339 <https://doi.org/10.1152/ajpregu.00158.2004>
- 340 Kakanj, P., Moussian, B., Grönke, S., Bustos, V., Eming, S. A., Partridge, L., & Leptin, M. (2016). Insulin and  
341 TOR signal in parallel through FOXO and S6K to promote epithelial wound healing. *Nature*  
342 *Communications*, 7, 12972. <https://doi.org/10.1038/ncomms12972>
- 343 Kim, J., & Neufeld, T. P. (2015). Dietary sugar promotes systemic TOR activation in *Drosophila* through AKH-  
344 dependent selective secretion of Dilp3. *Nat Commun*, 6, 6846. <https://doi.org/10.1038/ncomms7846>
- 345 Kim, S. K., & Rulifson, E. J. (2004). Conserved mechanisms of glucose sensing and regulation by *Drosophila*  
346 corpora cardiaca cells, 431(September), 316–320. <https://doi.org/10.1038/nature02913.1>.
- 347 Lee, G. J., Han, G., Yun, H. M., Lim, J. J., Noh, S., Lee, J., & Hyun, S. (2018). Steroid signaling mediates  
348 nutritional regulation of juvenile body growth via IGF-binding protein in *Drosophila*. *Proceedings of the*  
349 *National Academy of Sciences of the United States of America*, 115(23), 5992–5997.  
350 <https://doi.org/10.1073/pnas.1718834115>
- 351 Lund, V. K., Lycas, M. D., Schack, A., Andersen, R. C., & Gether, U. (2020). Rab2 drives axonal transport of  
352 dense core vesicles and lysosomal organelles, 1–52.
- 353 Okamoto, N., & Nishimura, T. (2015). Signaling from Glia and Cholinergic Neurons Controls Nutrient-  
354 Dependent Production of an Insulin-like Peptide for *Drosophila* Body Growth. *Developmental Cell*,  
355 35(3), 295–310. <https://doi.org/10.1016/j.devcel.2015.10.003>
- 356 Pan, X., Neufeld, T. P., Connor, M. B. O., Pan, X., Neufeld, T. P., & Connor, M. B. O. (2019). A Tissue- and  
357 Temporal-Specific Autophagic Switch A Tissue- and Temporal-Specific Autophagic Switch Controls

- 358 *Drosophila* Pre-metamorphic Nutritional Checkpoints. *Current Biology*, 1–12.  
359 <https://doi.org/10.1016/j.cub.2019.07.027>
- 360 Pan, X., Neufeld, T. P., & O'Connor, M. B. (2019). A Tissue- and Temporal-Specific Autophagic Switch  
361 Controls *Drosophila* Pre-metamorphic Nutritional Checkpoints. *Current Biology*, 29(17), 2840–2851.e4.  
362 <https://doi.org/10.1016/j.cub.2019.07.027>
- 363 Pan, X., & O'Connor, M. B. (2020). Coordination among multiple receptor tyrosine kinase signals controls  
364 *drosophila* developmental timing and body size. *BioRxiv*, 1–43.  
365 <https://doi.org/10.1101/2020.09.01.278382>
- 366 Park, S., Alfa, R. W., Topper, S. M., Kim, G. E. S., Kockel, L., & Kim, S. K. (2014). A Genetic Strategy to Measure  
367 Circulating *Drosophila* Insulin Reveals Genes Regulating Insulin Production and Secretion. *PLoS*  
368 *Genetics*, 10(8). <https://doi.org/10.1371/journal.pgen.1004555>
- 369 Petersen, M. C., & Shulman, G. I. (2018). Mechanisms of insulin action and insulin resistance. *Physiological*  
370 *Reviews*, 98(4), 2133–2223. <https://doi.org/10.1152/physrev.00063.2017>
- 371 Popken, G. J., Hodge, R. D., Ye, P., Zhang, J., Ng, W., O'Kusky, J. R., & D'Ercole, A. J. (2004). In vivo effects of  
372 insulin-like growth factor-I (IGF-I) on prenatal and early postnatal development of the central nervous  
373 system. *European Journal of Neuroscience*, 19(8), 2056–2068. [https://doi.org/10.1111/j.0953-](https://doi.org/10.1111/j.0953-816X.2004.03320.x)  
374 [816X.2004.03320.x](https://doi.org/10.1111/j.0953-816X.2004.03320.x)
- 375 Roed, N. K., Viola, C. M., Kristensen, O., Schluckebier, G., Norrman, M., Sajid, W., ... Brzozowski, A. M. (2018).  
376 Structures of insect Imp-L2 suggest an alternative strategy for regulating the bioavailability of insulin-  
377 like hormones. *Nature Communications*, 9(1). <https://doi.org/10.1038/s41467-018-06192-3>
- 378 Rulifson, E. J. (2002). Ablation of Insulin-Producing Neurons in Flies: Growth and Diabetic Phenotypes.  
379 *Science*, 296(5570), 1118–1120. <https://doi.org/10.1126/science.1070058>
- 380 Schindelin, J., Arganda-Carreras, I., Frise, E., Kaynig, V., Longair, M., Pietzsch, T., ... Cardona, A. (2012). Fiji:  
381 An open-source platform for biological-image analysis. *Nature Methods*, 9(7), 676–682.  
382 <https://doi.org/10.1038/nmeth.2019>
- 383 Sopko, R., & Perrimon, N. (2013). Receptor tyrosine kinases in *Drosophila* development. *Cold Spring Harbor*  
384 *Perspectives in Biology*, 5(6), 1–31. <https://doi.org/10.1101/cshperspect.a009050>
- 385 Sorkin, A., & Von Zastrow, M. (2009). Endocytosis and signalling: Intertwining molecular networks. *Nature*  
386 *Reviews Molecular Cell Biology*, 10(9), 609–622. <https://doi.org/10.1038/nrm2748>
- 387 Spéder, P., & Brand, A. H. (2018). Systemic and local cues drive neural stem cell niche remodelling during  
388 neurogenesis in *drosophila*. *ELife*, 7, 1–16. <https://doi.org/10.7554/eLife.30413>
- 389 Tennessen, J. M., Baker, K. D., Lam, G., Evans, J., & Thummel, C. S. (2011). The *Drosophila* estrogen-related  
390 receptor directs a metabolic switch that supports developmental growth. *Cell Metabolism*.

391 <https://doi.org/10.1016/j.cmet.2011.01.005>

392 Tokarz, V. L., MacDonald, P. E., & Klip, A. (2018). The cell biology of systemic insulin function. *Journal of Cell*

393 *Biology*, 217(7), 2273–2289. <https://doi.org/10.1083/jcb.201802095>

394 Topalidou, I., Cattin-Ortolá, J., Pappas, A. L., Cooper, K., Merrihew, G. E., MacCoss, M. J., & Ailion, M. (2016).

395 The EARP Complex and Its Interactor EIPR-1 Are Required for Cargo Sorting to Dense-Core Vesicles.

396 *PLoS Genetics*, 12(5), 1–29. <https://doi.org/10.1371/journal.pgen.1006074>

397 Von Bartheld, C. S. (2004). Axonal Transport and Neuronal Transcytosis of Trophic Factors, Tracers, and

398 Pathogens. *Journal of Neurobiology*, 58(2), 295–314. <https://doi.org/10.1002/neu.10315>

399 Von Bartheld, C. S., Wang, X. X., & Butowt, R. (2001). Anterograde axonal transport, transcytosis, and

400 recycling of neurotrophic factors: The concept of trophic currencies in neural networks. *Molecular*

401 *Neurobiology*, 24(1–3), 1–28. <https://doi.org/10.1385/MN:24:1-3:001>

402 Wang, Y., Bikle, D. D., & Chang, W. (2013). Autocrine and Paracrine Actions of IGF-I Signaling in Skeletal

403 Development. *Bone Research*, 1, 249–259. <https://doi.org/10.4248/BR201303003>

404 Willey, R. B., & Chapman, G. B. (1960). The ultrastructure of certain components of the corpora cardiaca in

405 orthopteroid insects. *Journal of Ultrastructure Research*, 4(1), 1–14. [https://doi.org/10.1016/S0022-](https://doi.org/10.1016/S0022-5320(60)80002-0)

406 [5320\(60\)80002-0](https://doi.org/10.1016/S0022-5320(60)80002-0)

407 Yamashita, N., Joshi, R., Zhang, S., Zhang, Z. Y., & Kuruvilla, R. (2017). Phospho-Regulation of Soma-to-Axon

408 Transcytosis of Neurotrophin Receptors. *Developmental Cell*, 42(6), 626-639.e5.

409 <https://doi.org/10.1016/j.devcel.2017.08.009>

410

411

412

413

414

415

416

417

418

419

420

421

422

423

424

425

## 426 Figure legends

427 **Figure 1. IPC-derived DILPs 2 and 5 accumulate in the corpora cardiaca.**

428 **(a-b)** Neuroanatomy of the larval central nervous system and ring gland complex showing **(b)** innervation of  
429 insulin-producing cells (IPC) and the corpora cardiaca (CC).

430 **(c-d)** Maximum z-volume projection of brain and ring gland complex of larvae expressing Synaptotagmin-1-  
431 GFP **(c.i and d.i, green)** specifically in the **(c)** IPC (*dilp2-gal4*) or the **(d)** CC (*akh-gal4*). Tissues are co-stained  
432 for DILP2 **(c.ii and d.ii, magenta)**. **Solid arrows** denote aortal projections from **(c)** IPC **(white arrow)** and **(d)**  
433 CC **(yellow arrow)**. **Open arrows** (yellow) show CC projections to the PG. Merged channels **(c.iii and d.iii)**  
434 channel show colocalization. Scale bar = 50um

435 **(e)** Wild-type CC soma stained for neuronal marker HRP **(e.i ; gray)**, DILP2 **(e.ii, green)** and DILP5 **(e.iii,**  
436 **magenta)**. Merged channel **(e.iv)** show DILP2 and DILP5 colocalization. **R** = pixel-based Pearson's correlation  
437 coefficient between the same. Scale bar = 10um.

438 **(f,h)** CC soma of IPC-specific (*dilp2-gal4*) **(f)** DILP2 RNAi in Dicer2-expressing background or **(h)** DILP5 RNAi  
439 **(h.iv-vi)** together with wild-type controls **(f.i-iii and h.i-iii)**. Stained for neuronal marker HRP **(f.i, f.iv, h.i and**  
440 **h.iv, gray)** and **(f)** DILP2 **(f.ii and f.v, green)** or **(h)** DILP5 **(h.ii and h.v, green)**. Merged channels **(f.iii, f.vi, h.iii**  
441 **and h.iv)** for clarity. Scale bar = 10um.

442 **(g, i)** Average fluorescence intensity of **(g)** DILP2 or **(i)** DILP5 normalized to the control mean. Each point  
443 represents a single CC soma. n = 3-7; \*\* = p < 0.01, Student's t-test.

444

445 **Figure 2. IMPL2 in the corpora cardiaca is necessary for DILP uptake.**

446 **(a)** CC soma specifically expressing (*akh-gal4*) Synaptotagmin-1-GFP **(a.i, yellow)**; stained for nuclei **(a.i, blue)**,  
447 IMPL2 **(a.ii, red)** and DILP2 **(a.iii, green)**.

448 **(b)** CC-specific (*akh-gal4*) RNAi-mediated knockdown of insulin receptor **(b.iv-vi)**, IMPL2 **(b.vii-ix)** and wild-  
449 type control **(b.i-iii)**. Stained for neuronal marker HRP **(b.i, b.iv, and b.vii, gray)** and DILP2 **(b.ii, b.v and b.viii,**  
450 **green)**. Merged channels **(b.iii, b.iv and b.ix)** for clarity.

451 **(d)** CC-specific(*akh-gal4*) RNAi-mediated knockdown of IMPL2 (**d.vii-ix**) and wild-type control (**b.i-iii**). Stained  
452 for neuronal marker HRP (**b.i, b.iv, and b.vii, gray**) and AKH (**d.ii, and d.iv, blue**).  
453 **(c, e)** Average fluorescence intensity of **(c)**DILP2 or **(e)**AKH normalized to the control mean. Each point  
454 represents a single CC soma. n =3-5; \*\*= p<0.01, ns = p>0.01; Student's t-test.  
455 Scale bar = 10um.

456

457

### 458 **Figure 3. Corpora cardiaca sequesters circulating DILPs.**

459 **(a)** Percentage pupariated of indicated genotype at various timepoints. AEL= after egg-laying. n=6 for each  
460 genotype.

461 **(b)** Pupal volume (n= 24), **(c)** adult weight (n=7, 9) and **(d)** adult wing area (n=55, 20) normalized to control.  
462 Each point represents a larva/fly in the case of pupal volume or wing area, and mean of a cohort of 8-15  
463 flies in the case weight measurements.

464 **(e)** Larval mass of indicated genotype at specified developmental time (n=8-12). Each point represents mean  
465 of cohorts of 13-15 flies.

466 **(f)** DILP2-HA-FLAG concentration in larval hemolymph of indicated genotype using driver line *akh-gal4,dilp2-*  
467 *HF* (n=7,5).

468 **(g)** Fat body of indicated genotype stained for nuclei (**g.i and g.iii, blue**) and mCherry (**g.ii and g.iv, red**).

469 White dashed outlines show the position of some nuclei in the mCherry channel. Scale bar = 50um. **(h)**

470 Boxplots showing ratio of nuclear to cytoplasmic mCherry intensity in fat bodies. Lower ratio indicates  
471 higher insulin activity. (n= 10)

472 Bar plots show mean and error bars indicate standard deviation. AEL= after egg-laying. \*\*= p<0.01, ns =

473 p>0.01, **(b-e)** Student's t-test and **(f,h)** two-tailed Mann-Whitney U test.

474

### 475 **Figure 4. DILPs and AKH colocalize in corpora cardiaca dense-core vesicles.**

476 **(a)** Schematic representation of experimental approach.

477 Electron micrograph of

478 **(b)** the CC soma (epon-embedded sections). N = nucleus, G = Golgi complex, ER = endoplasmic reticulum,  
479 and DCV= dense-core vesicle. Scale bar = 500nm.

480 **(c)** Part of cytoplasm in the CC soma (methylacrylate sections). DILP5 labelled with immunogold particles of  
481 5nm diameter. Dashed red line indicates area occupied by DCVs. Scale bar = 500nm **(d)** Quantification of

482 gold particle density (no. of particles/ $\mu\text{m}^2$ ) from DCV area (**dashed red line**) or rest of the cytoplasm (**solid**  
483 **black line**) from multiple acquisitions (n=4). Bar plot indicates mean.

484 High-resolution electron micrographs of  
485 (e) a multi-vesicular body (MVB, e.i) and a dense-core vesicle(DCV, e.ii) in the CC soma. DILP2 and DILP5 are  
486 stained by 10nm (closed arrow) and 5nm (open arrow) immunogold particles respectively. Scale = 100nm.  
487 (f) DCV area (f.i) stained for DILP2 (10nm gold particle) and AKH (5nm gold particle). Dashed blue box  
488 outlines a single DCV (f.ii) magnified on the right, DILP2 (closed yellow arrow) and AKH (open gray arrow).  
489 Scale bar = 100nm.  
490 (g) Histogram showing immunogold particle size vs. frequency distribution in (f), highlighting relative  
491 abundance of DILP2 (yellow) and AKH (gray).

492  
493

494 **Figure 5. Corpora cardiaca DILPs enable starvation-induced accelerated pupariation.**

495 (a) Experimental setup for larval starvation  
496 (b-c) Means of percentage pupariation connected across timepoints for the indicated genotype- starved  
497 (dashed line) or kept feeding (solid line) as shown in (a). Fed controls are the same as shown in Figure 3a.  
498 n=6 for each curve; p-value from two-way ANOVA with repeated measures and Bonferroni's post t-test for  
499 multiple comparisons. Error bars indicate +/- S.D. \*\*= p<0.01 and ns = p>0.01  
500 (d,f) CC soma of genotype (d) *akh>w1118* and (f) *akh>KIR2.1* stained for HRP(d.i,d.iv, f.i and f.iv; gray ) and  
501 DILP2 (d.ii, d.v, f.ii and f.v; green). KIR2.1 expression inactivates neurons through hyperpolarization. Scale  
502 bar = 10um.  
503 (e,g) Average fluorescence intensity of DILP2 normalized to the mean of fed controls. Each point represents  
504 a single CC soma. n =3-5.  
505 (h-i) DILP2-HA-FLAG concentration in larval hemolymph of indicated genotype using driver line *akh-*  
506 *gal4,dilp2-HF* (n=4-5).  
507 (j) Fat body of indicated genotype stained for nuclei (j.i and j.iii; blue) and mCherry (j.ii and j.iv; red). White  
508 dashed outlines show the position of some nuclei in the mCherry channel. Scale bar = 50um. (k) Boxplots  
509 showing ratio of cytoplasmic to nuclear mCherry intensity in fat cells (n=5).  
510 (l) Prothoracic gland of indicated genotype stained for nuclei (l.i, l.iii, l.v and l.vii; blue) and mCherry (l.ii, l.iv,  
511 l.vi and l.viii; red). White dashed outlines show the position of some nuclei in the mCherry channel. Scale  
512 bar = 10um. (k) Boxplots showing ratio of nuclear to cytoplasmic mCherry intensity in prothoracic gland  
513 cells. n=4-8.  
514 AEL= after egg-laying. \*\*= p<0.01, ns = p>0.01, (e-g) Student's t-test and (h,i,k,m) two-tailed Mann-Whitney  
515 U test.

516



517

518

519

520

521

522

## 523 Materials and methods

### 524 Flies

525 All fly lines/crosses were maintained and grown on standard media containing cornmeal, molasses, agar  
526 and yeast extract under a 12hour light/dark cycle at 25°C (unless explicitly stated otherwise).

### 527 List of fly strains used

| Strain                 | Source                                          | Identifier |
|------------------------|-------------------------------------------------|------------|
| w1118                  | BDSC                                            | #5905      |
| IPC-Gal4 (Dilp2-Gal4)  | BDSC                                            | #37516     |
| CC-Gal4 (akh-Gal4)     | (Tennessen, Baker, Lam, Evans, & Thummel, 2011) | NA         |
| dFOXO-mCherry          | (Kakanj et al., 2016)                           | NA         |
| gDilp2-HA-FLAG         | (Park et al., 2014)                             | NA         |
| UAS-SYT1-GFP           | BDSC                                            | #6926      |
| UAS-KIR2.1-GFP         | BDSC                                            | #6596      |
| UAS-Dcr2               | BDSC                                            | #24651     |
| UAS-DILP2-RNAi         | BDSC                                            | #31068     |
| UAS-DILP5-RNAi         | BDSC                                            | #31378     |
| UAS-InR-RNAi           | BDSC                                            | #31037     |
| UAS-IMPL2RNAi          | BDSC                                            | #64936     |
| DILP-2,3,5,7 knock-out | BDSC                                            | #30889     |
| ap-Gal4, tub-Gal80TS   | Spannl et. al., 2020                            | NA         |

528

529 Fly strains *dilp2-Gal4,>dcr2* , *akh-Gal4,Foxo-mCherry* , *akh-Gal4,qdilp2-HF* and *ap-Gal4,tub-Gal80TS,Foxo-*  
530 *mCherry* were generated in this paper by crossing the above lines and are available upon request.

531

532 **Developmental timing and starvation**

533 Fly crosses were fed fresh yeast paste and allowed to lay eggs for 3 hours on apple-juice agar plates.  
534 Following egg-laying, the plates were stored at 25°C. After 18-24 hours of incubation, freshly hatched L1  
535 larvae were collected in PBS in intervals of 2 hours. In order to prevent overcrowding, no more than 20-30  
536 larvae were transferred into a single food vial using a micropipette and shifted to the incubator at 25°C with  
537 12/12 day-night cycle. At specified time after egg-laying, larvae were carefully washed out of the food using  
538 PBS. Subsequently they were quickly transferred to 1% agar vials (same quantity as food). Fed controls were  
539 not washed out, and left to feed in their original vials. Both starved and fed control vials were returned to  
540 the same incubator.

541 For pupariation timing, number of pupae including white pre-pupae were manually counted at fixed  
542 intervals as indicated. Counting was stopped when there was no increase for 3-4 consecutive time points.  
543 The same dataset have been used in Figure 3a, and to depict fed controls in Figure 5b,c .

544 For all other starvation experiments, starved and fed control larvae were washed out of the agar/food with  
545 PBS, rinsed and used in respective assays.

546

547 **Weight measurements**

548 **Larval weight:** At specified developmental stage, larvae were collected from food/agar in PBS, washed 3x  
549 times to remove stuck food and cold-anesthetized. Female larvae were selected under the microscope to  
550 prevent sex-dependent size variation. Cohorts of 13-15 larvae were blotted on a tissue paper (to ensure no  
551 extra liquid) and transferred to a pre-weighed 1.5ml micro-centrifuge tube using forceps. The tube with  
552 larvae was then weighed using a fine balance (Sartorius).

553 **Adult weight:** Virgin females (2 days after eclosion) were anesthetized and collected in pre-weighed 1.5ml  
554 micro-centrifuge in cohorts of 10 flies per tube. The tube with adult flies was weighed using a fine balance  
555 (Sartorius).

556 Average weight in each case was calculated by dividing the weight difference with the number of larvae/flies  
557 in each tube.

558

559 **Size determination**

560 **Adult wing area:** Females (1 day after eclosion) were collected and stored in isopropanol. Prior to dissection,  
561 flies were transferred to a cavity dissection-glass. Care was taken to keep flies submerged in adequate  
562 isopropanol at all times. One wing from each fly was dissected using fine forceps (Dumont, No.5-SA) and  
563 transferred to a glass slide along with a small amount of isopropanol (in forceps due to capillary action). It  
564 is important to keep wings flat on the slide surface. This can be achieved by repeatedly moistening the wings

565 with isopropanol, using forceps. Once the desired number of wings were obtained, 30ul of Euparal (Roth,  
566 cat#7356.1) was pipetted on the slide. Next, a glass coverslip (22mm/22mm/17um) was placed covering  
567 the entire area on the slide occupied by wings. To ensure absence of air bubbles and minimum displacement  
568 in the wings, it is important to place the coverslip starting from one edge. Following mounting, the slides  
569 were left to dry for 2 hours prior to imaging. Single wing images were taken using Zeiss Sv11 dissection  
570 scope fitted with a CCD camera (Jenoptik ProgRes C10).

571 **Pupal volume:** Pupae (24-30-hours APF) were collected using a wet brush. Following which, they were  
572 washed with PBS to dislodge attached food and glue. Each pupa was then transferred to a single well of a  
573 transparent 24-well plate and imaged using Zeiss Sv11 dissection scope fitted with a CCD camera (Jenoptik  
574 ProgRes C10). Sex determination was done post-eclosion and only females were taken for analysis.

#### 575 576 **Dilp2-HF ELISA**

577 Nunc MaxiSorp Flat-Bottom plates (Thermo Fisher Scientific) were coated with anti-FLAG M2 antibody  
578 (Sigma, cat#F1804) diluted in BupH Carbonate-Bicarbonate Buffer (Thermo Fisher Scientific, cat#28382)  
579 overnight at 4°C. The plates were washed 2x in wash buffer – PBS + 0.2% Tween20 (Sigma, cat#P7949) and  
580 blocked in 2% filter-sterilized BSA in PBS overnight at 4°C. 1mL of hemolymph was collected by bleeding 5-  
581 8 heterozygous gDilp2-HF larvae on a clean cavity slide. The hemolymph was diluted in 55mL PBS and  
582 centrifuged at 10,000rpm for 10 minutes to remove hemocytes and debris. 50mL supernatant and 1mL of  
583 anti-HA-HRP antibody (Roche, cat#12013819001) solution (1:500) was incubated in the coated wells  
584 overnight at 4°C. 100 ml of 1-Step-Ultra TMB-ELISA Substrate (Thermo Fisher, cat#34028) was pipetted to  
585 each well and incubated for 30 minutes in dark at room temperature. Reaction was stopped by adding 100  
586 ml of 2M sulfuric acid per well. The samples colorized instantly and the absorbance was measured  
587 immediately at 450nm using a plate reader (BMG Labtech). Standard curve was generated by self-generated  
588 FLAG(GS)HA peptide. The detailed method is described in Park et al., (2014).

#### 589 590 **Immunofluorescence**

591 Freshly dissected tissue in PBS was fixed with 4% paraformaldehyde (cat#16005, Aldrich) for 20 minutes.  
592 After fixation, tissues were thoroughly washed 3-4 times with PBS. The following protocol was used  
593 depending on tissue type.

594 **Brain, ring gland and fat body:** Tissues were permeabilized with PBS containing 0.2%(v/v) Triton X-100(Serva  
595 Electrophoresis GmbH, cat#37240.01) for 2 hours at room temperature with shaking. Primary incubation  
596 with antibody was done overnight in incubation buffer- PBS with 0.2% Triton X-100 (PBST) and 1mg/ml  
597 bovine serum albumin (BSA) (Sigma, cat#A2153). Incubation was followed by 3x15 minute washes with the

598 same incubation buffer without antibodies. Secondary incubation was done with antibody diluted in  
599 incubation buffer supplemented with 4%(v/v) normal goat serum (NGS) overnight at 4°C. Tissues were then  
600 washed 4X15 minutes in 0.2%PBST and mounted on glass slides using VectaShield H-1000(cat# H-1000-10)  
601 mounting medium.

602 **Wing discs:** Discs were permeabilized with PBS containing 0.05%(v/v) Triton X-100 supplemented with  
603 1mg/ml bovine serum albumin (BSA) and 250mM NaCl for 3X10 minutes at room temperature with shaking.  
604 Primary incubation with antibody was done overnight in incubation buffer- PBS with 0.05% Triton X-100  
605 (PBST) and 1mg/ml bovine serum albumin (BSA). Incubation was followed by 3x15 minute washes with the  
606 same incubation buffer without antibodies. Secondary incubation was done with antibody diluted in  
607 incubation buffer supplemented with 4%(v/v) normal goat serum (NGS) for 2-3 hours. Wing discs were then  
608 washed 3X15 minutes in 0.1%PBST and mounted on glass slides using VectaShield H-1000 mounting  
609 medium.

610 All washing and incubation steps were performed on a shaker. Fat bodies from late larval stages disintegrate  
611 easily and requires extra care while handling, preferably shaking at a low rpm.

612

### 613 List of primary antibodies

| Antibody | Host species | Dilution | Source                                            |
|----------|--------------|----------|---------------------------------------------------|
| Dilp2    | Rat          | 1:400    | (Géminard et al., 2009)                           |
| Dilp5    | Rat          | 1:1000   | This paper                                        |
| Dilp5    | Rabbit       | 1:500    | (Géminard et al., 2009)                           |
| Akh      | Rabbit       | 1:800    | (Isabel,Martin,Chidami,<br>Veenstra,&Rosay, 2005) |
| mCherry  | Rabbit       | 1:500    | Invitrogen #PA5-34974                             |
| GFP      | Rabbit       | 1:500    | Invitrogen #A111022                               |
| IMPL2    | Rabbit       | 1:1000   | (Bader et al., 2013)                              |

614

615 Secondary antibodies/dyes used were DAPI (1:2000 from 5mg/ml stock, Roche), DyLight 405 goat anti-HRP  
616 (1:500, Jackson IR, cat#123-475-021), AlexaFlour-488 goat anti-rabbit (1:1000, Invitrogen #A11034),  
617 AlexaFlour-568 goat anti-rabbit (1:500, Invitrogen #A11036) and AlexaFlour-647 goat anti-rat (1:500,  
618 Invitrogen #A21247).

619

### 620 Confocal Light microscopy

621 Three imaging setups have been used for fixed samples-

622 1. Olympus FV1000 laser scanning confocal microscope on Olympus BX61 inverted stand and driven by  
623 FV10-ASW 1.7 software. Brain and ring gland whole mounts were imaged with Olympus UApochromat 40x  
624 1.3NA oil immersion objective. Corpora cardiaca cells were imaged with Olympus UApochromat 60x 1.35  
625 NA oil immersion objective.

626 2. Andor spinning disc confocal microscope on Olympus IX81 inverted stand using Andor iXON 897 EMCCD  
627 camera with Yokogawa CSUX1 scanhead, running on Andor software. Some fat bodies were imaged with  
628 Olympus U Plan SApo 60x/ 1.35NA oil immersion objective.

629 3. Olympus FV3000 laser scanning confocal microscope on Olympus IX83 inverted stand and driven by  
630 FV31S-SW acquisition software. Corpora cardiaca cells and wing discs were imaged with Olympus  
631 UPLXApochromat 60x 1.42 NA oil immersion objective.

632

### 633 **Electron microscopy**

634 **Morphology:** Dissected brain-ring gland complexes were initially fixed in PBS with 2%PFA (cat#16005,  
635 Aldrich) and 1% glutaraldehyde (cat#G5882, Sigma) for 2 hours at room temperature followed by overnight  
636 incubation at 4°C. Then the samples were post-fixed with 1% OsO<sub>4</sub> (cat# 19190, EMS) and 1.5% potassium  
637 ferrocyanide (cat#: P9387, Sigma-Aldrich) in water on ice for 1 hour. En bloc staining was done in the dark  
638 with 1% UA (cat# 21447, Polyscience Europe GmbH) in water at 4°C overnight. Following infiltration and  
639 embedding, 70nm sections were cut on a Leica Ultracut UCT (Leica Microscopy systems) and picked up with  
640 formvar (cat# 15800, EMS) coated slot grids (cat# G2010-Cu, EMS). All samples were then post-stained with  
641 1% UA (cat# 21447, Polysciences Europe GmbH) in water for 10 minutes and 0.04% lead citrate (cat# 17800,  
642 EMS) for 5 minutes. Electron micrographs were obtained at 80kV using Morgagni (Emsis Morada CCD  
643 camera, formerly Sys/Olympus) and 100kV using Tecnai 12 (TVIPS F416 camera) electron microscopes (both  
644 from Thermo Fisher Scientific (formerly FEI/Philips)).

645

646 **Immunogold labelling:** Dissected brain-ring gland complexes were initially fixed in PBS with 4% PFA and  
647 0.05% glutaraldehyde for 20 minutes at room temperature. Post-fixation was done in 1:1 dilution of the  
648 initial fixative overnight at 4°C. Ring glands were then embedded with 12% gelatin (cat# G-2500, Sigma-  
649 Aldrich) in PBS and infiltrated with 2.3M sucrose (cat# 21600, EMS) in PBS overnight at 4°C. The sucrose  
650 infiltrated Ring gland in gelatin was mounted on an aluminum pin and snap frozen in LN<sub>2</sub> and cryosectioned  
651 on a Leica Ultracut EM UC6 ultramicrotome (Leica Microscopy systems). 70nm Sections were picked up  
652 using a 1 :1 mixture of 2.3M sucrose and 2% methyl cellulose (cat# M-6385, Sigma-Aldrich) as a pick-up  
653 solution and sections were transferred to carbon and formvar coated mesh grids (cat# H100-Cu, EMS). After

654 removal of gelatin by incubation on PBS at 37 °C, sections were labelled with rabbit-anti-Dilp2/Dilp5 or goat-  
655 anti-AKH Antibody (diluted 1 to 20 or 1 to 100 from original antibody solution) followed by secondary  
656 antibody coupled to 10-nm gold (British Biocell or BbisoLutions) and secondary fluorescence antibodies  
657 (donkey-anti-rat Alexa594 cat# A-21209, Molecular Probes Europe B.V., goat-anti-rabbit Alexa488 cat# A-  
658 21206, Mol. Probes Europe B.V.) The sections were first imaged with epifluorescence on a Zeiss upright  
659 ApoTome microscope with AxioCam506 camera to locate regions of interest in individual sections and  
660 contrasted with a mixture of 1.9% methyl cellulose/0.3% UA for 10min on ice and the corresponding regions  
661 of interest were observed by using a Morgagni or Tecnai12 electron microscope.

662

### 663 **Image analysis and quantification**

664 **Whole cell:** Individual cells from multiple samples were manually segmented and mean intensity was  
665 measured using Fiji/ImageJ (Schindelin et al., 2012) .

666 **Co-localization :** Single confocal images from two different channels were used in Coloc 2 plugin in  
667 Fiji/ImageJ (Schindelin et al.,2012) .

668 **Nuclear and cytoplasmic intensity ratio:** Regions of interested were manually drawn on respective tissues.  
669 Nuclear to cytoplasmic intensity ratio was then calculated using a Fiji/ImageJ macro developed by Volker  
670 Baecker at Montpellier RIO Imaging (Intensity Ratio Nuclei Cytoplasm Tool, [RRID:SCR\\_018673](#)).  
671 Documentation can be accessed [here](#) . Same analysis parameters were used across samples compared.

672 **Electron micrographs:** For morphological sections, composite images were assembled in Fiji (Schindelin et  
673 al., 2012) using ImageJ TrackEM2 plugin (Cardona et al., 2012). For immunogold labelling, regions of interest  
674 were visually determined and gold particles were hand-counted in Fiji/ImageJ.

675 **Wing area:** Each wing blade was hand segmented and area measured in pixels using a self-written macro  
676 on Fiji/ImageJ.

677 **Pupal volume:** Using a self-written Fiji/Imagej macro, an ellipse was fitted to the pupa. Volume was  
678 calculated assuming an ellipsoid using the formula below (minor axis length as the height) -

679 
$$\text{Volume} = 0.75\pi * (\text{major-axis}) * (\text{minor-axis})^2.$$

680

### 681 **Data representation and statistical analysis**

682 Data wrangling was done using Microsoft Excel and R-Studio (version 1.3.1093). R-Studio was also used for  
683 plotting. Packages used in R- plyr, dplyr, ggplot2 and xlsx. Plots generated through R were then formatted  
684 using Adobe Illustrator 2021. Illustrations were generated using BioRender ([www.biorender.com](http://www.biorender.com)).

685 Statistical analysis was done using Microsoft Excel, GraphPad Prism 5.0 and online through  
686 <https://www.socscistatistics.com> . Information about sample sizes and statistical tests used in this study can

687 be found in the respective figure legends. Detailed information on sample size and replicates have also been  
688 summarized in **Table 1** of the supplementary material.  
689

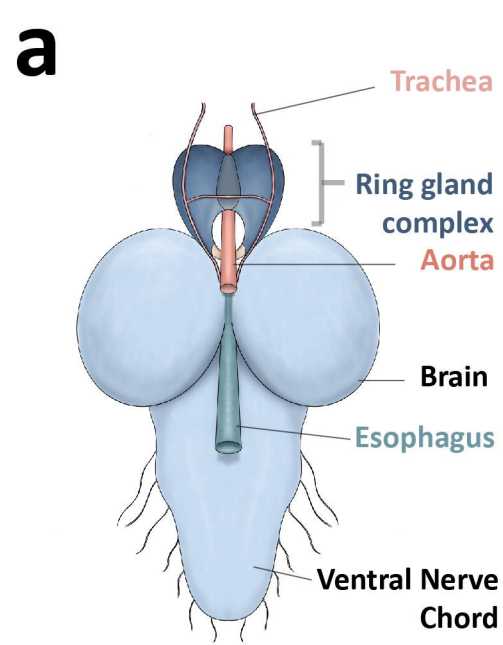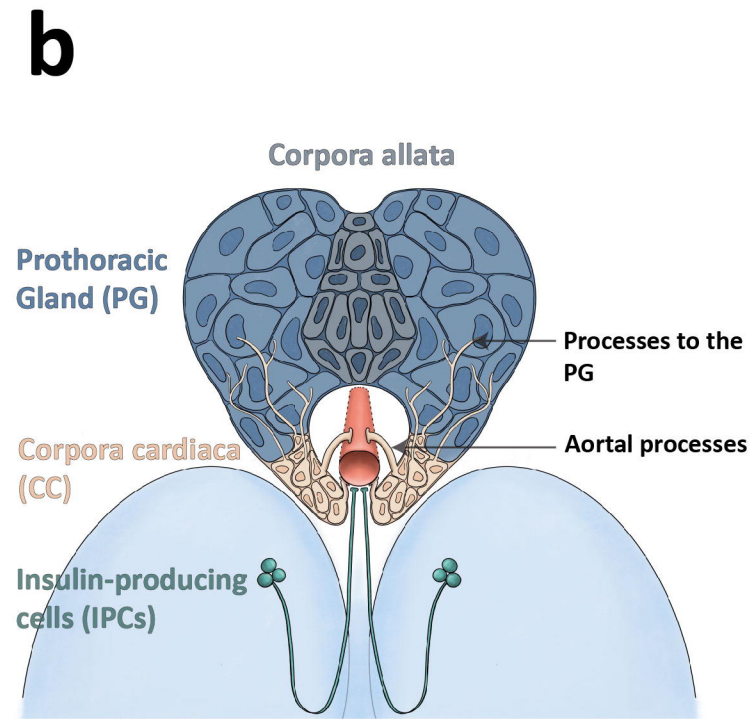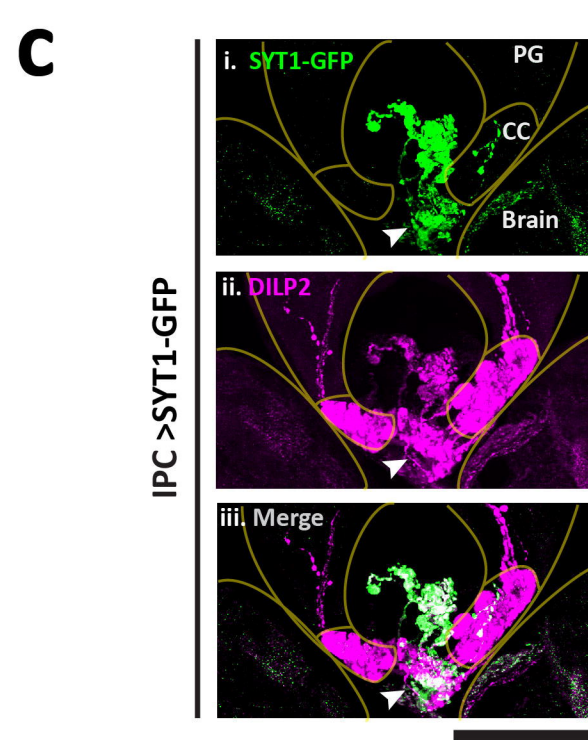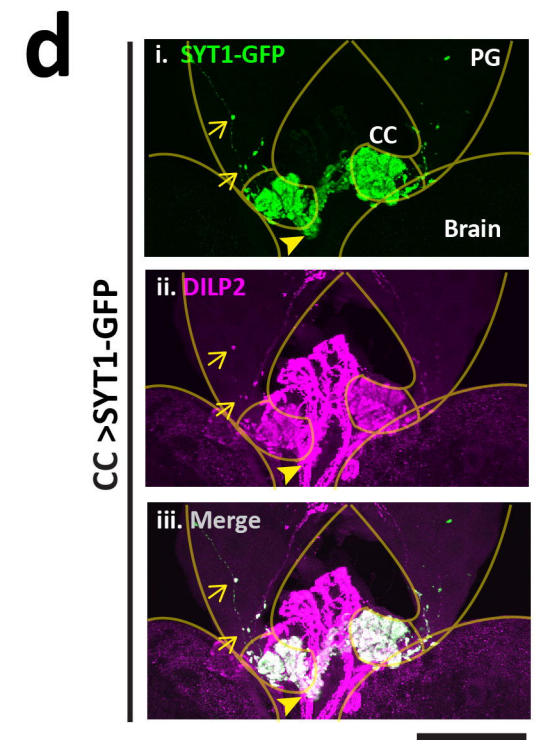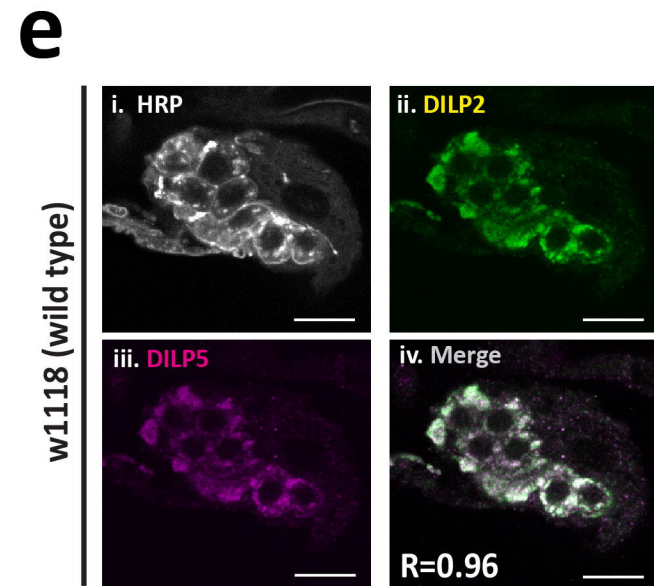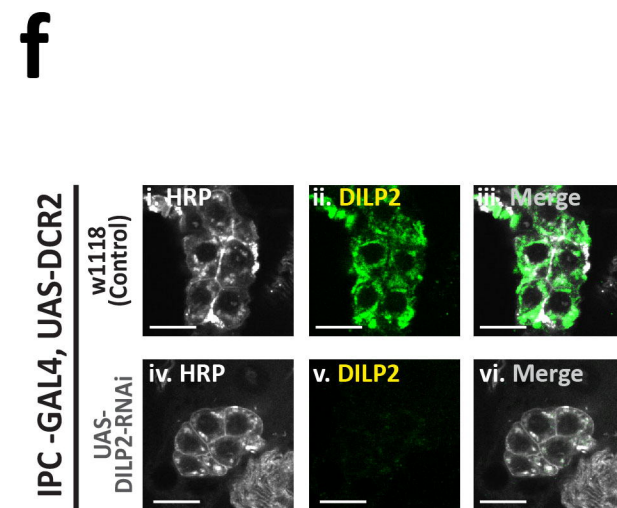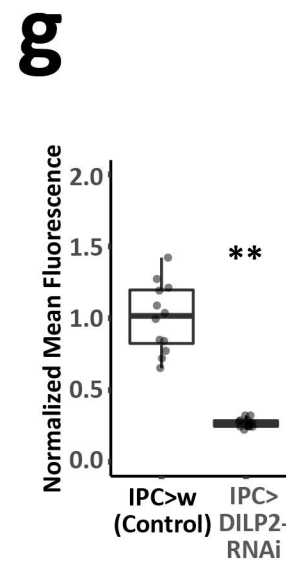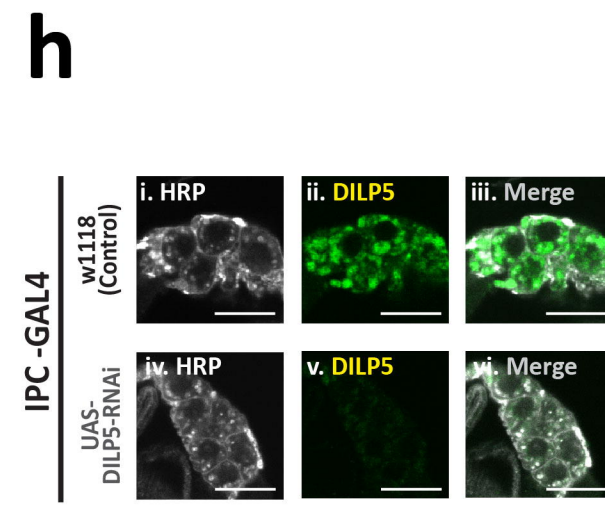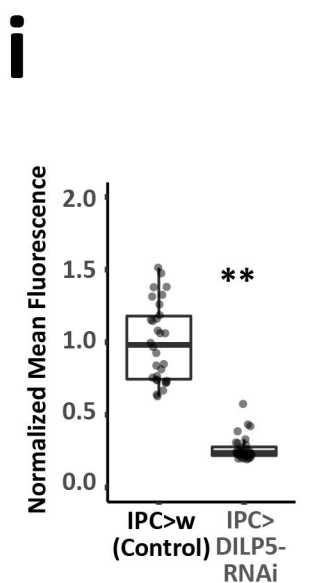



**a**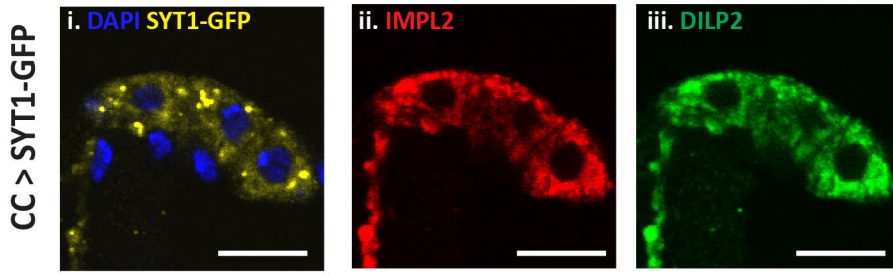**b**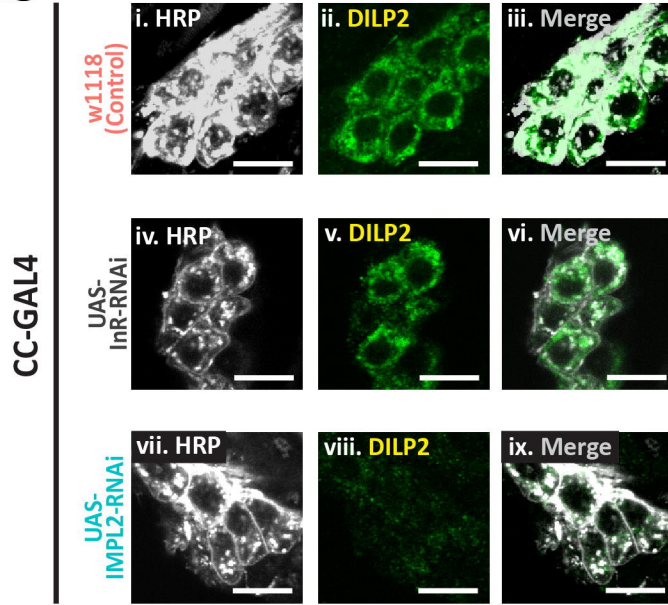**c**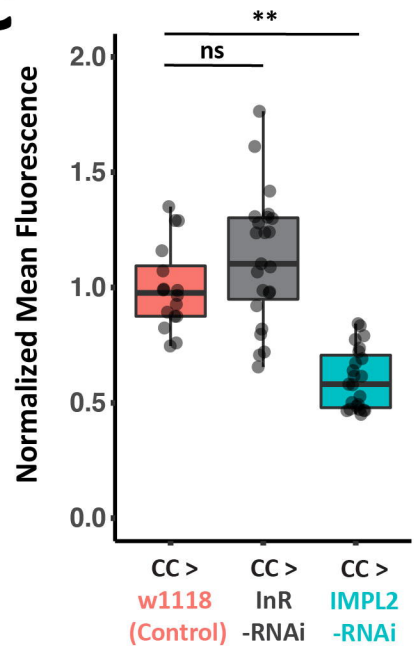**d**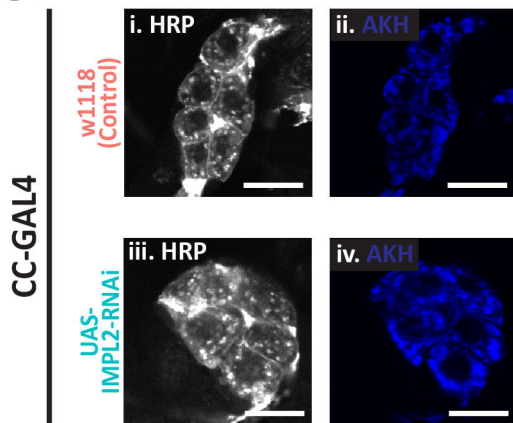**e**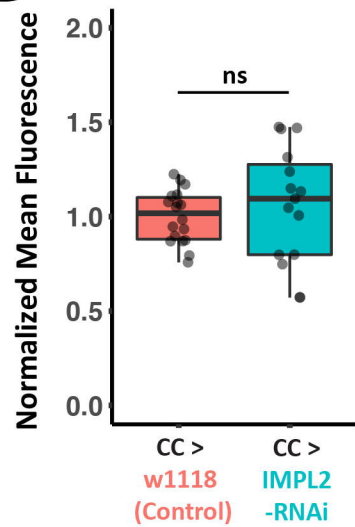

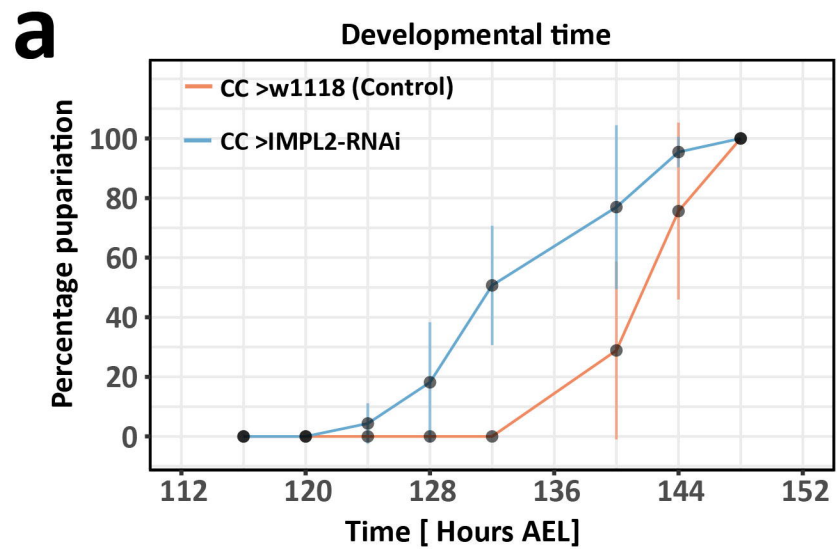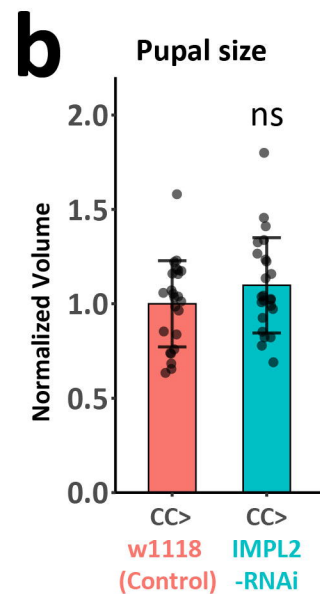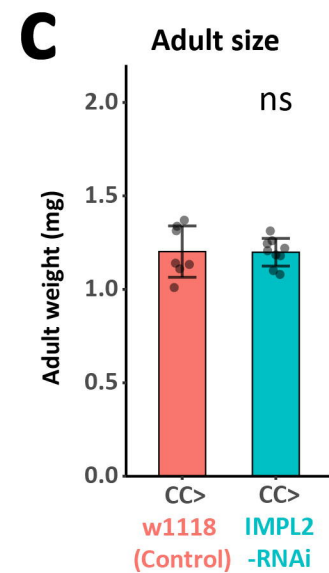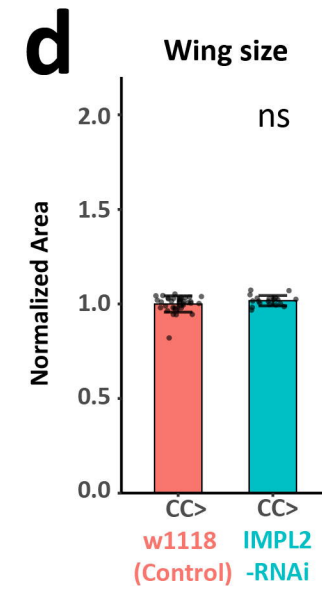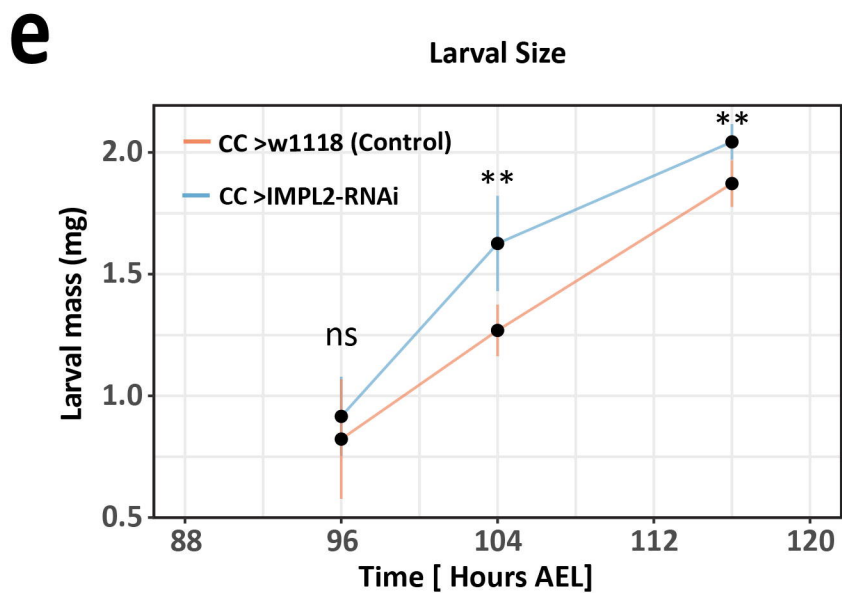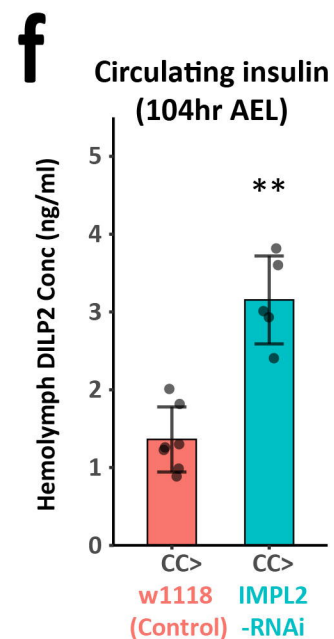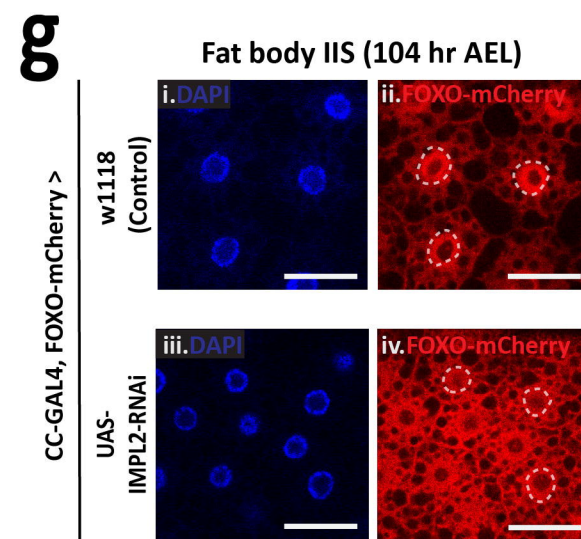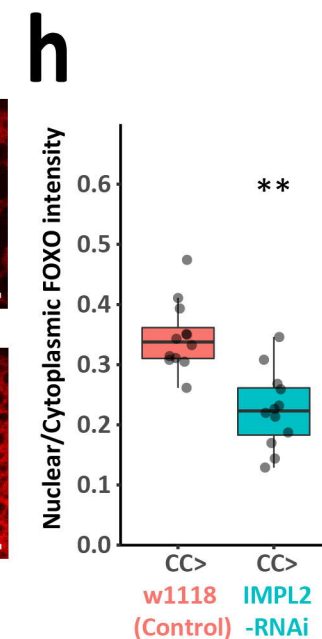

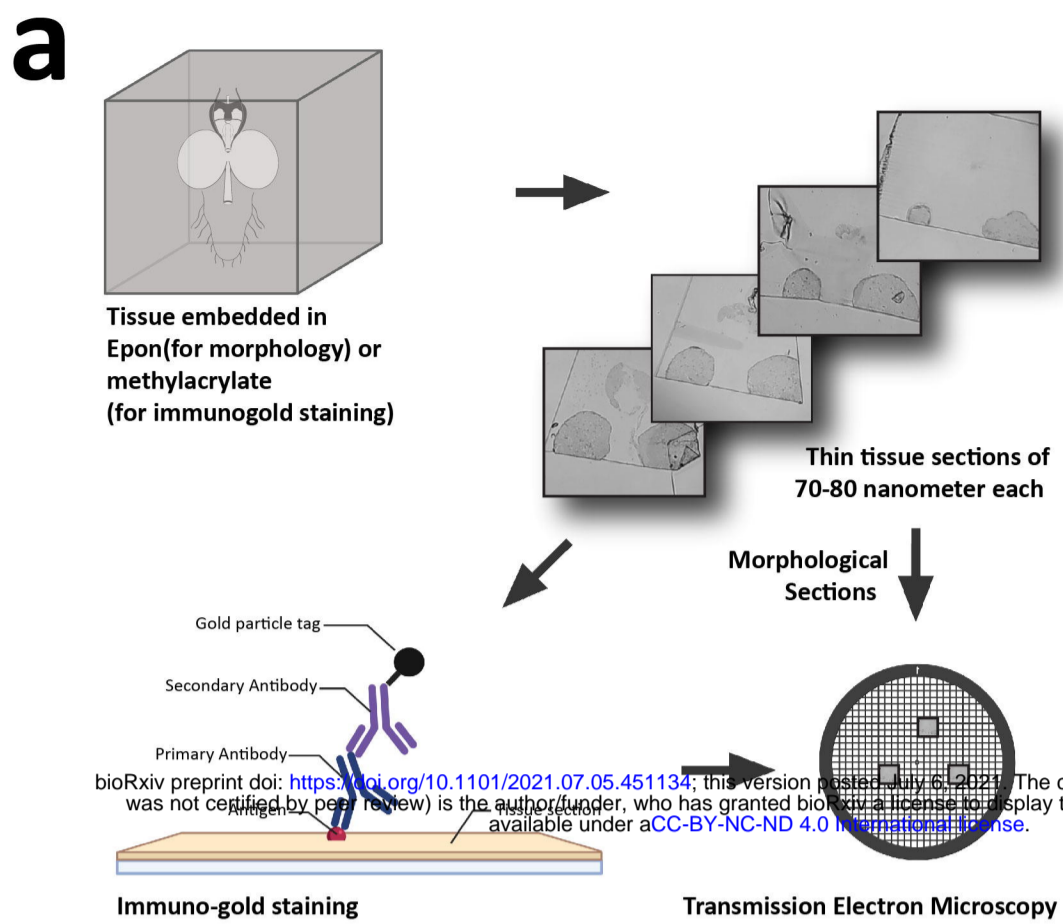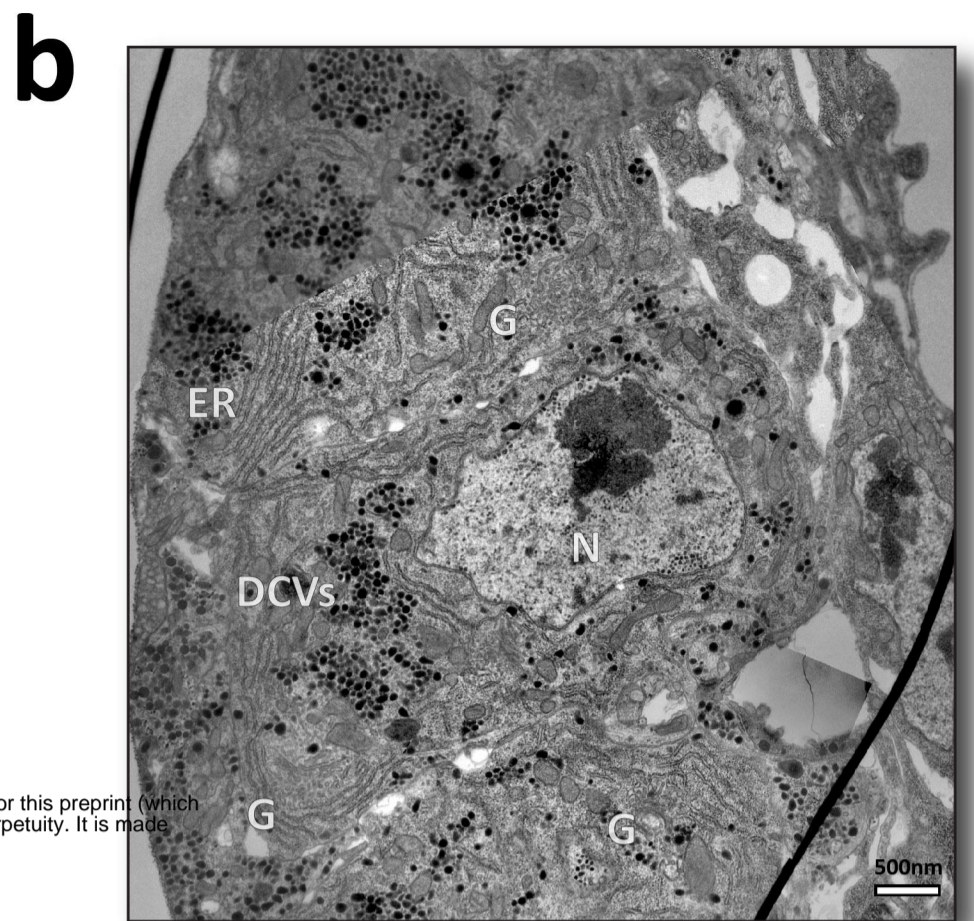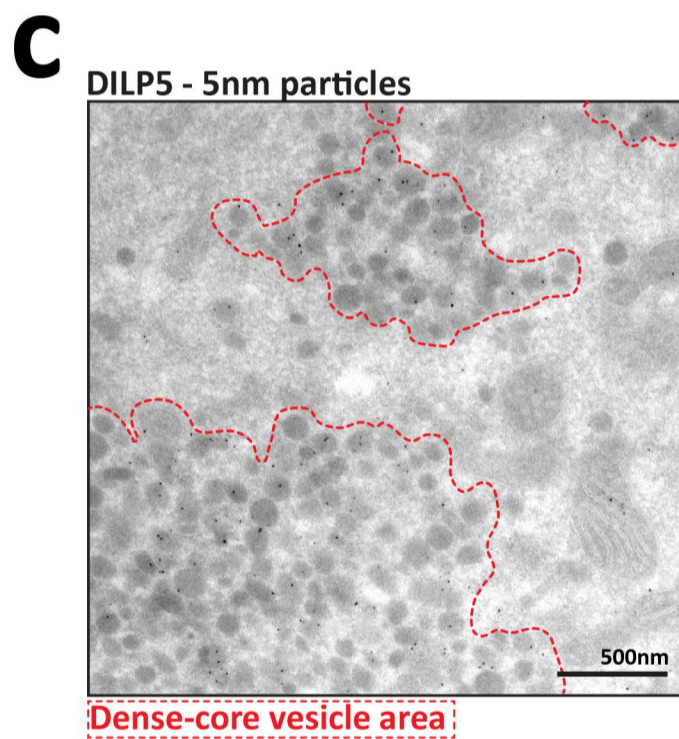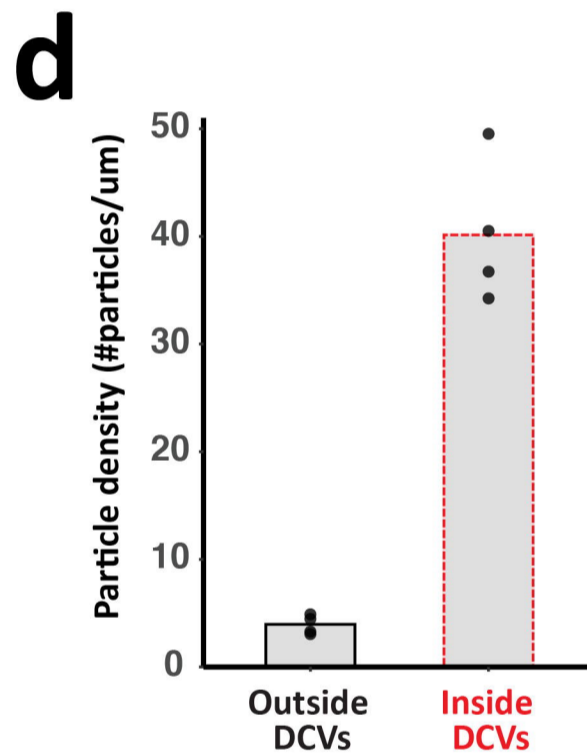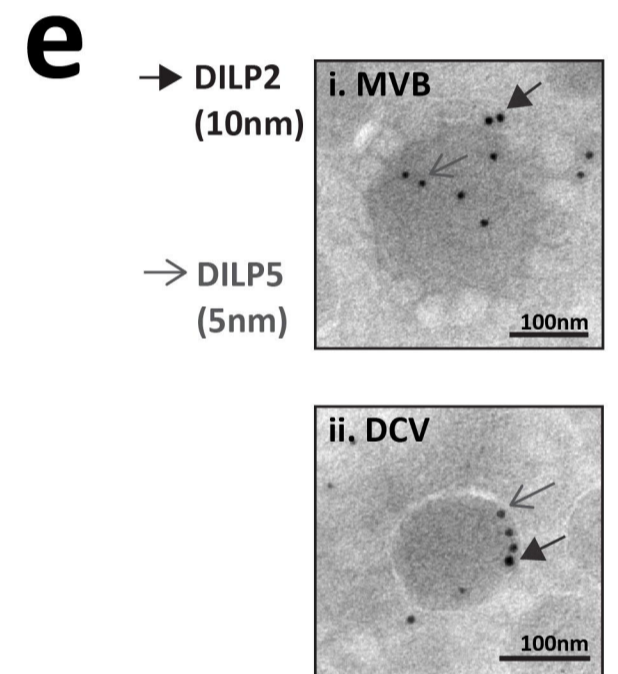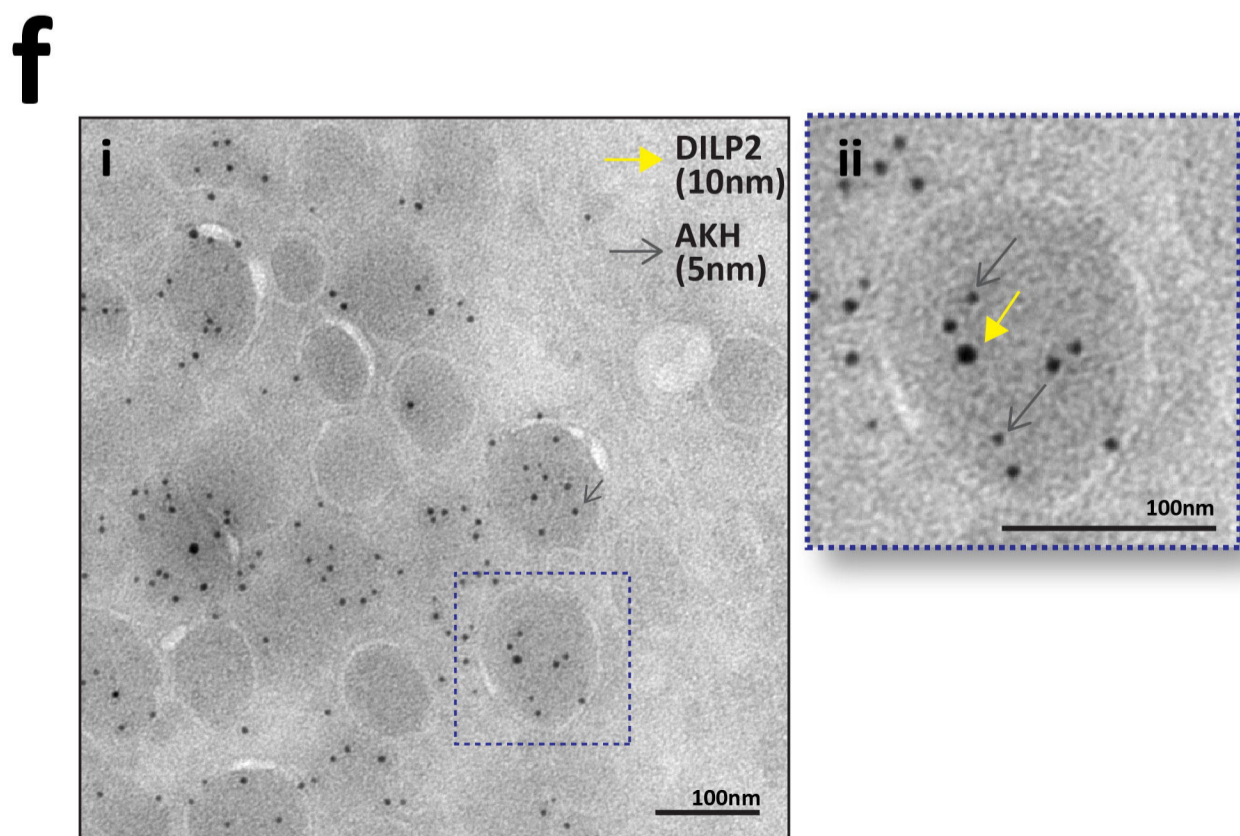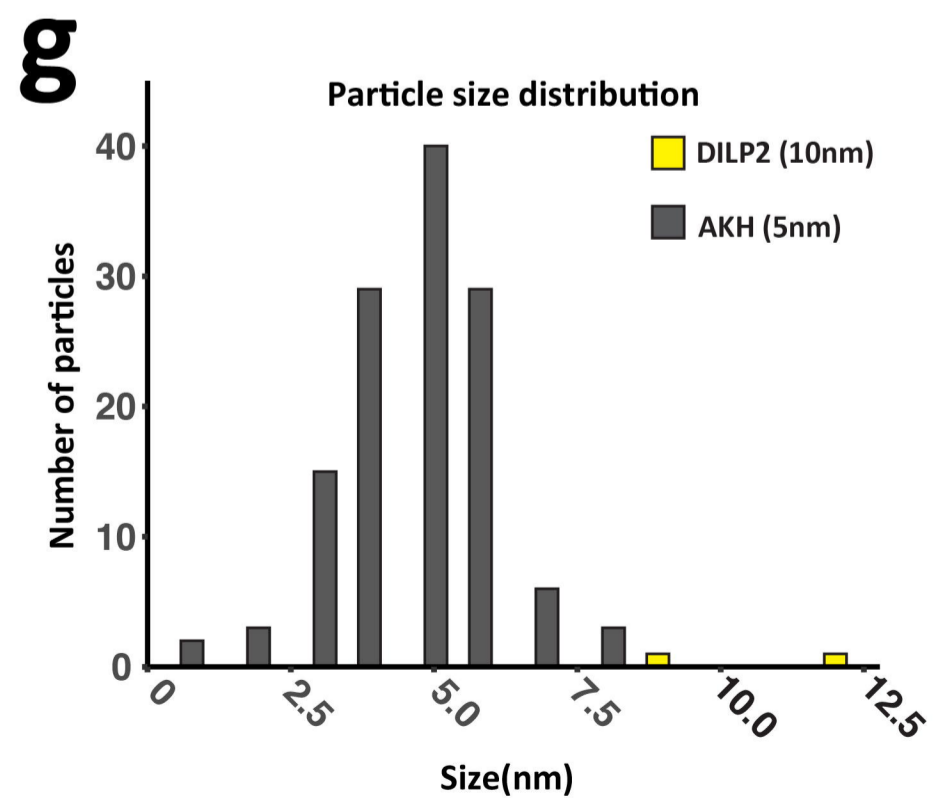

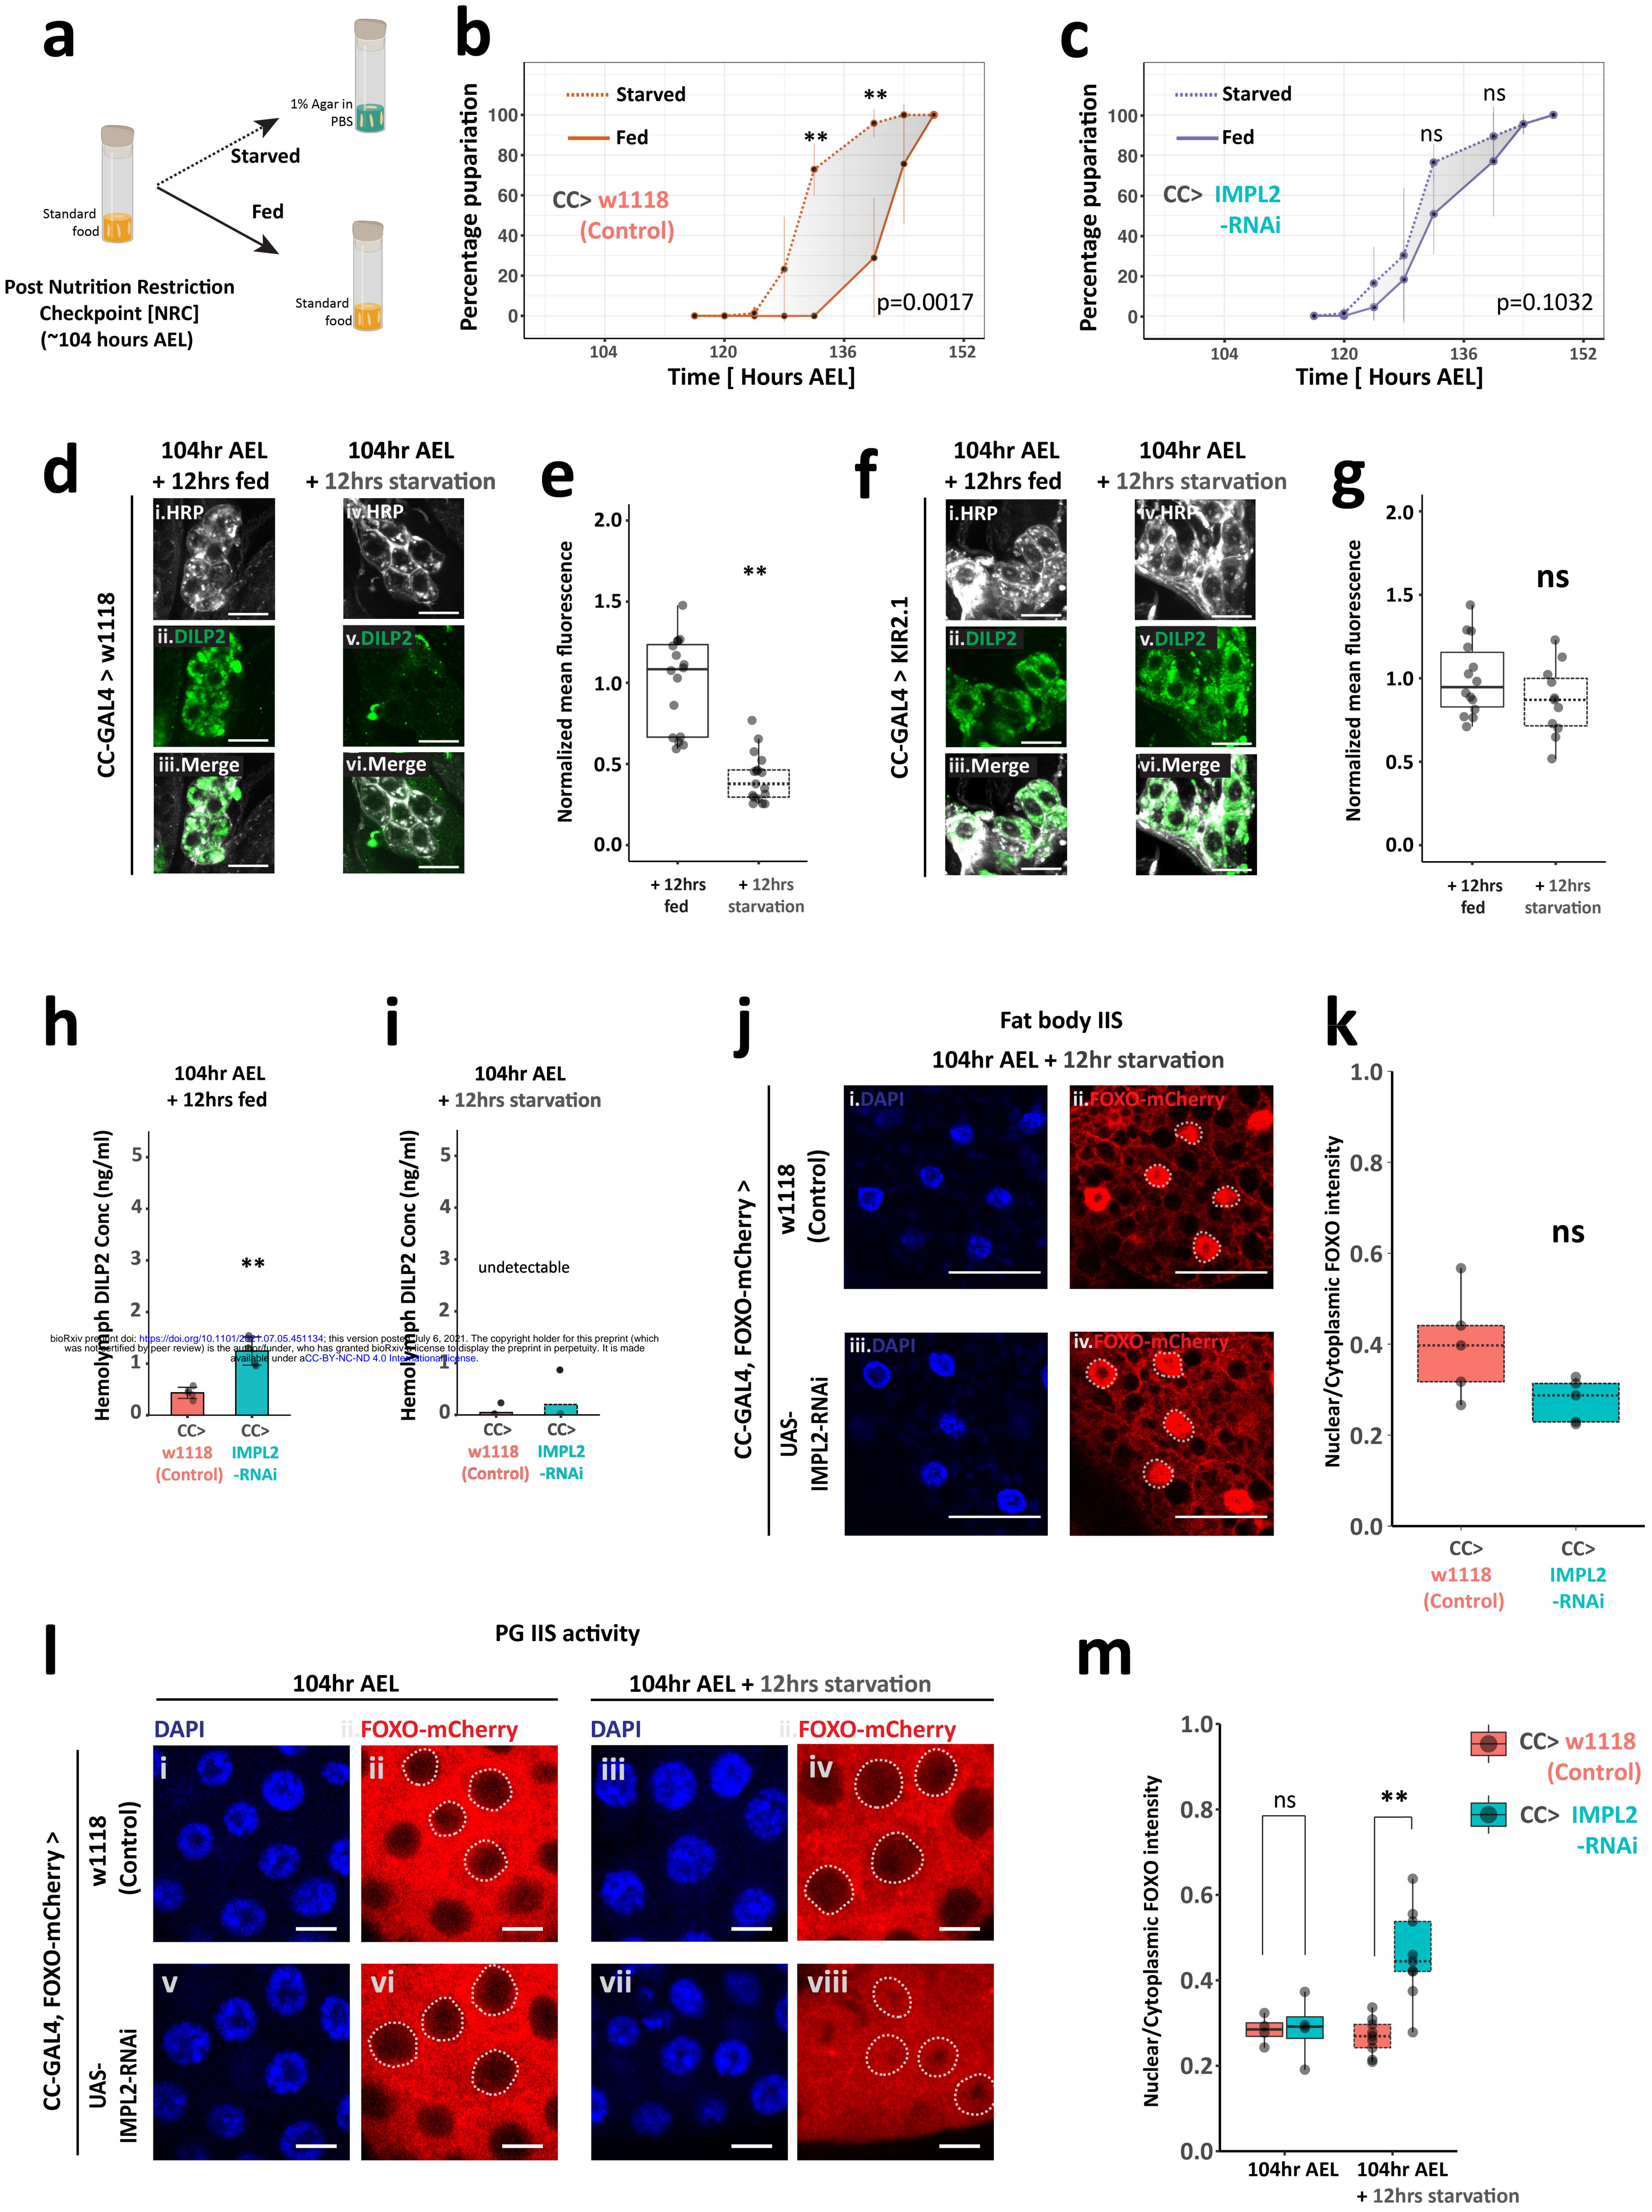

Source: https://www.biorxiv.org/content/10.1101/2021.07.05.451134v2.full.pdf
